# Supplementary material for: The evolution of root zone moisture capacities after land use change: a step towards predictions under change?
Source: Copernicus journal article supplement (doi:10.5194/hess-2016-427), 2016-08-29
Supplement: Supplementary file 1 [file hess-2016-427-supplement.pdf]

# Supplementary Material

## S1. Protocol

*Experiment:* The evolution of root zone moisture capacities after land use change

*Partners:* SMHI, Bristol

*Lead:* TUD

### Formal protocol

*Execution*

#### i. Data requirements and formatting

Required data: Long-term hydrological data (i.e. daily precipitation, runoff and potential evaporation) for at least 20 years for at least one and temporally well documented, land use change (ideally deforestation). Selected catchments are Hubbard Brook WS2 and WS5, and HJ Andrews WS1.

#### ii. Experiment execution steps

- a. TUD: Determine time series of root zone moisture capacity based on water-balance.
- b. SMHI, Bristol, TUD: Randomly run models with a moving time window of 2 years. Compute Kling-Gupta Efficiency, log Kling-Gupta Efficiency and Volume Error for each model run.
- c. TUD: Adjust model with a more dynamic formulation of the root zone storage capacity. Randomly run adjusted model and original model for a longer time series including deforestation. Compute hydrological signatures.

#### iii. Result reporting

- a. Mat-files with the used parameter combinations and performance metrics for each window.

*Analysis*

- i. Trend analysis for the water balance derived root zone storage capacities
- ii. Derive posterior distributions for window-based model runs for the root zone storage capacity or the equivalent parameter for each model.

- iii. Calculate probability of improvement and ranked probability score for each hydrological signature for the adjusted model with time-varying root zone storage capacity and the original model.
- iv. Analyse/interpret findings.

## S2. Model descriptions

### 2.1 FLEX

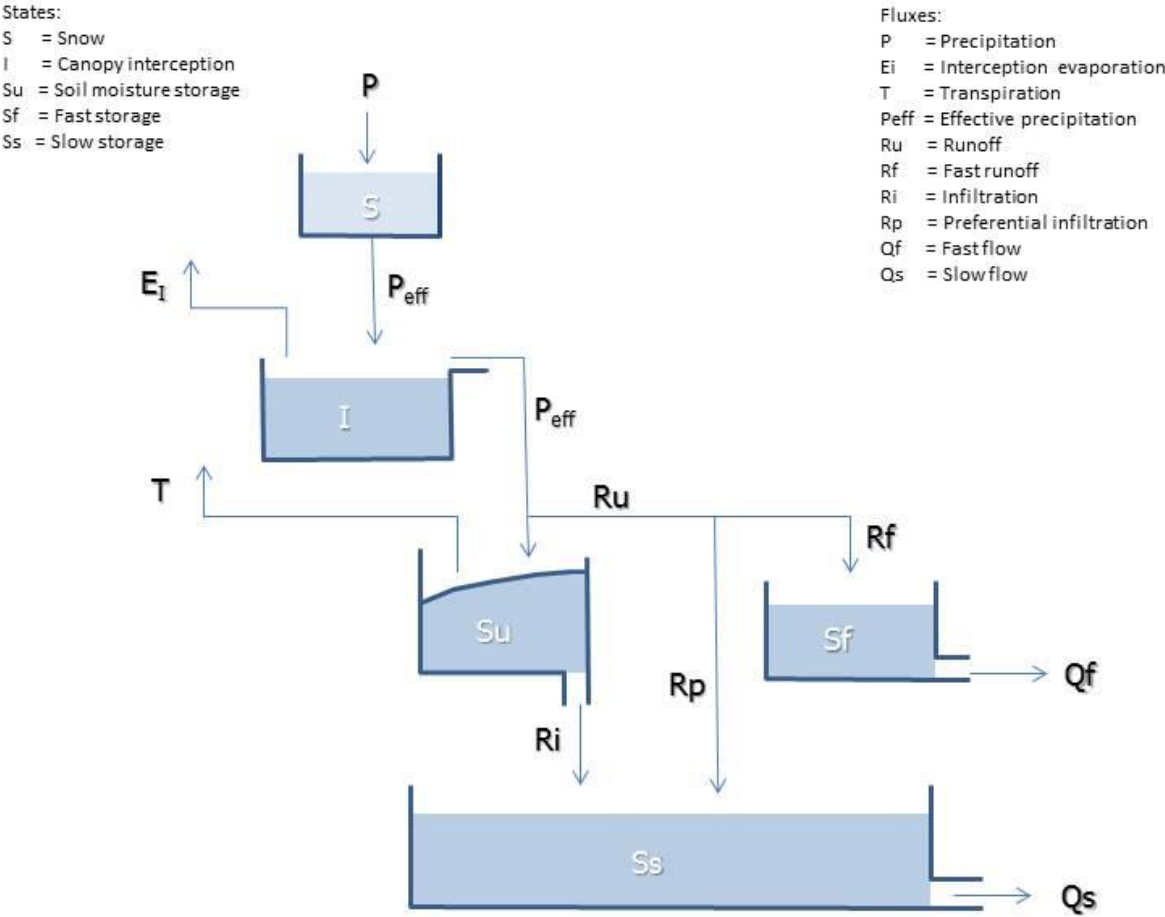

Figure S1. FLEX model structure.

Table S1. Parameters with descriptions and prior ranges for the FLEX model

| <b>Parameters</b> | <b>Unit</b> | <b>Min</b> | <b>Max</b> | <b>Description</b>                                                    |
|-------------------|-------------|------------|------------|-----------------------------------------------------------------------|
| Melfactor         | mm/°C       | 4          | 5          | Water released with a degree change temperature                       |
| Tthresh           | °C          | -1         | 0          | Threshold temperature to separate rain from snow                      |
| Imax              | mm          | 0.0        | 0          | Maximum interception capacity                                         |
| Sumax             | mm          | 1.0        | 1000       | Maximum soil moisture storage                                         |
| Beta              | -           | 0.01       | 3          | Shape factor soil moisture function                                   |
| Kf                | days        | 1          | 10         | Recession coefficient fast reservoir                                  |
| Ks                | days        | 60         | 65         | Recession coefficient slow reservoir                                  |
| D                 | -           | 0.0        | 1.0        | Partition of runoff that preferentially percolates to the groundwater |
| Pmax              | mm/d        | 0.0        | 10         | Maximum percolation to the groundwater                                |

Table S2. Water balance and constitutive relations applied in the FLEX model

| Reservoir      | Water balance equation                      | Constitutive relation                                                                                                                                                                                                                                                                                                                                                                                                                                                                   |
|----------------|---------------------------------------------|-----------------------------------------------------------------------------------------------------------------------------------------------------------------------------------------------------------------------------------------------------------------------------------------------------------------------------------------------------------------------------------------------------------------------------------------------------------------------------------------|
| Snow           | $\frac{dS_{Snow}}{dt} = P - M$              | $P_{e,s} = \begin{cases} Meltfactor * (T_a - T_{thresh}) & \text{if } T_a > T_{thresh} \\ 0 & \text{if } T_a \leq T_{thresh} \end{cases}$                                                                                                                                                                                                                                                                                                                                               |
| Interception   | $\frac{dS_I}{dt} = P_{e,s} - E_i - P_{eff}$ | $P_{eff} = \max(0, S_i + P_{e,s} - I_{max})$ $E_i = \min(E_p, S_i - P_{eff})$ $S_{i,new} = S_{i,old} + P_{e,s} - P_{eff} - E_i$                                                                                                                                                                                                                                                                                                                                                         |
| Soil moisture  | $\frac{dS_u}{dt} = P_{eff} - E_t - R - P$   | $S_{u,m} = (1 + \beta) S_{u,max} \left( 1 - \left( 1 - \frac{S_u}{S_{u,max}} \right)^{1/(1+\beta)} \right)$ $R = P_{eff} - S_{u,max} + S_u + S_{u,max} * \left( 1 - \frac{P_{eff} + S_{u,m}}{(1 + \beta) S_{u,max}} \right)^{1+\beta}$ $E_t = \begin{cases} E_p \frac{S_u}{0.5 * S_{u,max}} & \text{if } S_u \leq 0.5 * S_{u,max} \\ \min(E_p, S_u) & \text{if } S_u > 0.5 * S_{u,max} \end{cases}$ $P = P_{max} \frac{S_u}{S_{u,max}}$ $S_{u,new} = S_{u,old} + P_{eff} - R - E_t - P$ |
| Fast reservoir | $\frac{dS_f}{dt} = (1 - D) * R - Q_f$       | $Q_f = K * S_f$ $S_{f,new} = S_{f,old} + (1 - D) * R - Q_f$                                                                                                                                                                                                                                                                                                                                                                                                                             |

Slow  
reservoir

$$\frac{dS_s}{dt} = D * R + P - Q_s$$

$$Q_s = K * S_s$$

$$S_{s,new} = S_{s,old} + D * R - Q_s$$

## 2.2 HYPE

States:

- S = Snow
- S1 = Soil layer 1
- S2 = Soil layer 2
- S3 = Soil layer 3

Fluxes:

- P = Precipitation
- Pr = Rainfall
- M = Snowmelt
- Peff = Effective precipitation
- E1 = Evaporation layer 1
- E2 = Evaporation layer 2
- qr,i = Surface runoff (low infiltration)
- qr = Surface runoff
- qm = Macropore flow
- qp = Percolation
- q1 = Runoff layer 1
- q2 = Runoff layer 2
- qs = Groundwater flow
- qtot = Final outflow after routing

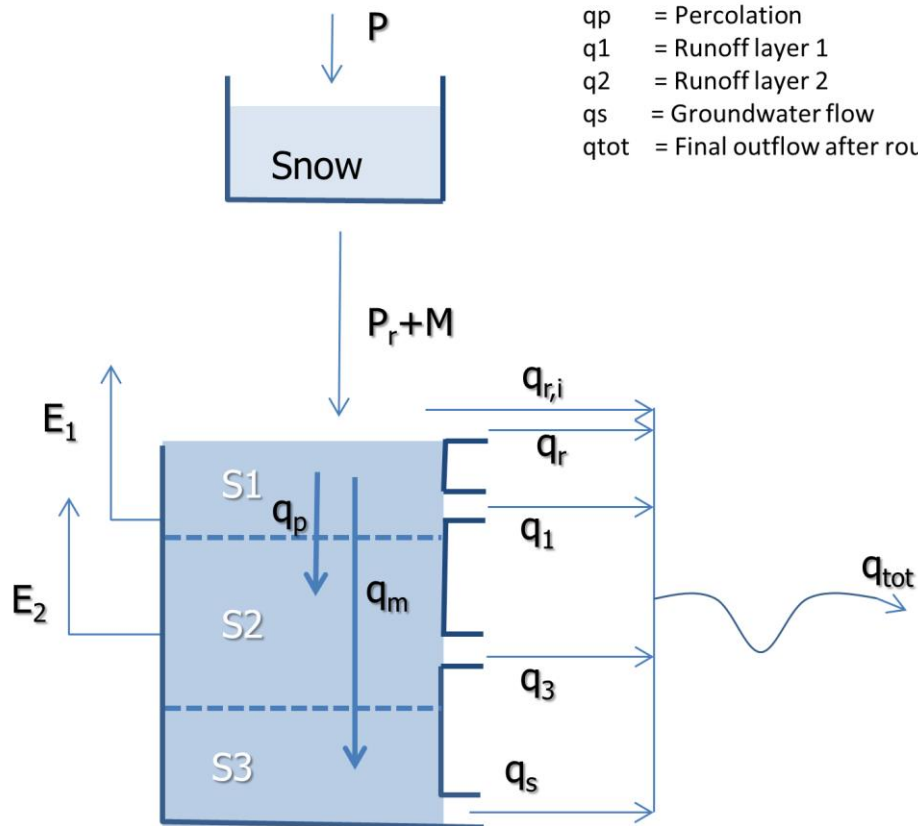

Figure S2. HYPE model structure.

Table S2. Parameters with descriptions and prior ranges for the HYPE model

| <b>Parameters</b> | <b>Unit</b> | <b>Min</b> | <b>Max</b> | <b>Description</b>                                                                             |
|-------------------|-------------|------------|------------|------------------------------------------------------------------------------------------------|
| wcfc              | -           | 0.05       | 0.35       | fraction of soil available for evapotranspiration but not for runoff, same for all soil layers |
| wcep              | -           | 0.05       | 0.4        | effective porosity as a fraction, same for all soil layers                                     |
| wcwp              | -           | 0.05       | 0.5        | wilting point as a fraction, same for all soil layers                                          |
| rrcs1             | -           | 0.05       | 0.6        | recession coefficient for uppermost soil layer                                                 |
| rrcs2             | -           | 0.05       | 0.6        | recession coefficient for lowest soil layer                                                    |
| mperc1            | -           | 5          | 100        | maximum percolation capacity from soil layer 1 to soil layer 2                                 |
| mperc2            | -           | 5          | 100        | maximum percolation capacity from soil layer 2 to soil layer 3                                 |
| mactrsm           | -           | 0.2        | 0.9        | threshold soil water for macro-pore flow and surface runoff                                    |
| macrate           | -           | 0.1        | 0.5        | fraction for macro-pore flow                                                                   |
| mactrinf          | mm/d        | 10         | 45         | threshold for macro-pore flow                                                                  |
| srrcs             | -           | 0.01       | 0.2        | recession coefficient for surface runoff                                                       |
| cmlt              | mm/°/d      | 2          | 5          | melting parameter for snow                                                                     |
| ttmp              | °C          | 0          | 1          | threshold temperature for snow melt and evapotranspiration                                     |
| lp                | -           | 0.7        | 1          | limit for potential evapotranspiration                                                         |



|        |     |     |   |                                  |
|--------|-----|-----|---|----------------------------------|
| rivvel | m/s | 0.5 | 2 | celerity of flood in watercourse |
|--------|-----|-----|---|----------------------------------|

## 2.3 TUV

States:

S = Snow  
Ssm = Soil moisture storage  
Suz = Upper storage  
Slz = Lower storage

Fluxes:

P = Precipitation  
E = Evaporation  
P<sub>eff</sub> = Effective precipitation  
Cperc = Percolation  
q0 = Surface runoff  
q1 = Subsurface runoff  
q2 = Baseflow  
Q<sub>f</sub> = Total discharge

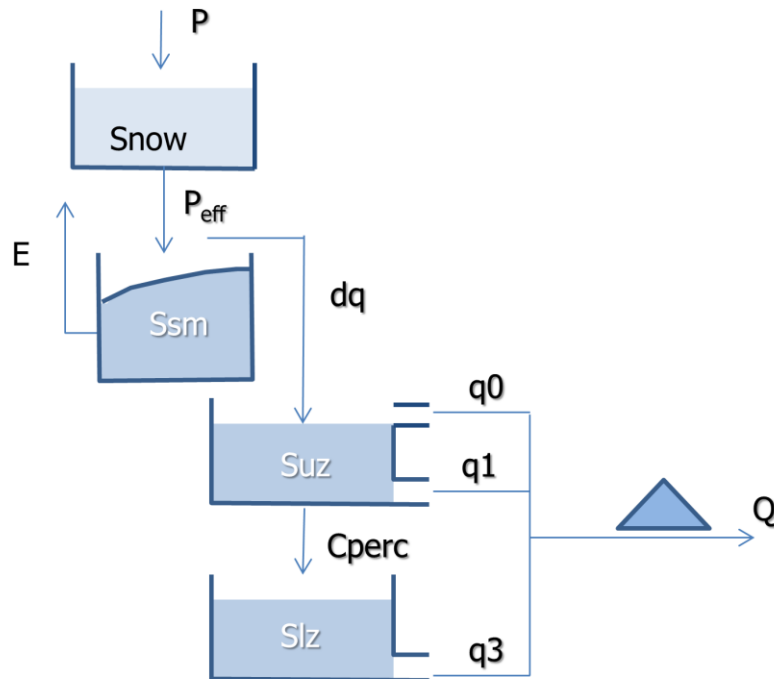

Figure S3. TUV model structure.

Table S3. Parameters with descriptions and prior ranges for the TUW model

| <b>Parameters</b> | <b>Unit</b>          | <b>Min</b> | <b>Max</b> | <b>Description</b>                                                      |
|-------------------|----------------------|------------|------------|-------------------------------------------------------------------------|
| SCF               | -                    | 0.9        | 1.5        | Snow correction factor                                                  |
| DDF               | Mm/°C /d             | 0          | 6          | Degree day factor                                                       |
| Tr                | mm                   | 1.0        | 3.0        | Threshold temperature above which precipitation is rain                 |
| Ts                | mm                   | -3.0       | 1          | Threshold temperature below which precipitation is snow                 |
| Tm                | -                    | -2.0       | 2          | Threshold temperature above which melt starts                           |
| LPrat             | days                 | 0          | 1          | Parameter related to the limit for potential evaporation                |
| FC                | mm                   | 0.0        | 1000       | field capacity, i.e., max soil moisture storage                         |
| Beta              | -                    | 0.0        | 20.0       | the non linear parameter for runoff production                          |
| k0                | days                 | 0.0        | 2          | storage coefficient for very fast response                              |
| k1                | days                 | 2.0        | 5          | storage coefficient for fast response                                   |
| k2                | days                 | 5.0        | 30         | storage coefficient for slow response                                   |
| lsuz              | mm                   | 1.0        | 100.0      | threshold storage state, i.e., the very fast response start if exceeded |
| Cperc             | mm/d                 | 0.0        | 8.0        | constant percolation rate                                               |
| bmax              | days                 | 0.0        | 10.0       | maximum base at low flows                                               |
| croute            | day <sup>2</sup> /mm | 0.0        | 50.0       | free scaling parameter                                                  |

## 2.4 HYMOD

States:

S = Snow  
Su = Soil moisture storage  
Sq = Quick storage  
Ss = Slow storage

Fluxes:

P = Precipitation  
E = Evaporation  
P<sub>eff</sub> = Effective precipitation  
Qq = Quick flow  
Qs = Slow flow

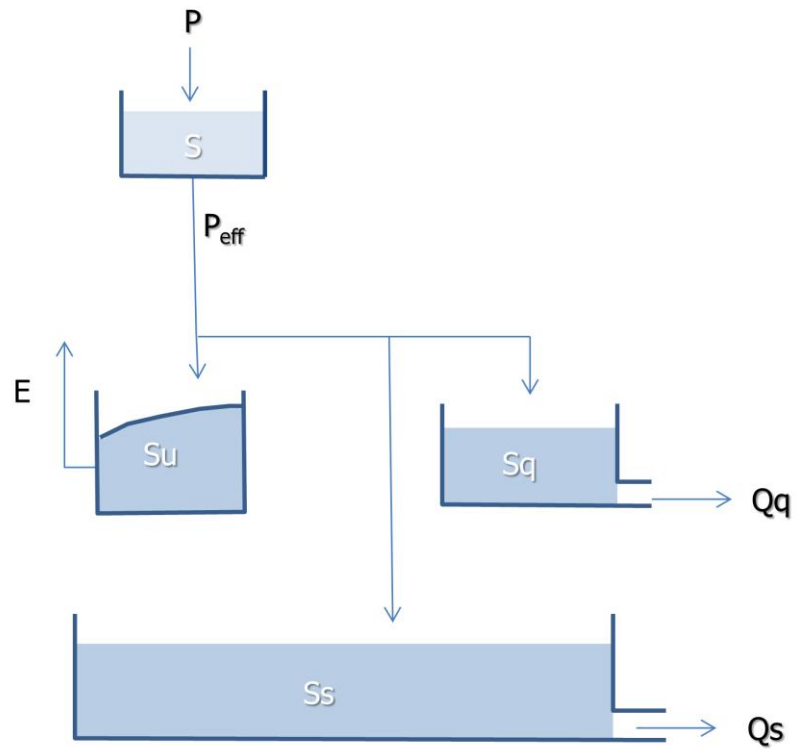

Figure S4. HYMOD model structure.

Table S4. Parameters with descriptions and prior ranges for the HYMOD model

| <b>Parameters</b> | <b>Unit</b> | <b>Min</b> | <b>Max</b> | <b>Description</b>                                            |
|-------------------|-------------|------------|------------|---------------------------------------------------------------|
| DDF               | Mm/°C /d    | 0          | 6          | Degree day factor                                             |
| Tb                | °C          | -3.0       | 3.0        | Threshold temperature above which precipitation is rain       |
| Tth               | °C          | -2.0       | 2          | Threshold temperature below which precipitation is snow       |
| alpha             | -           | 0.0        | 1          | Parameter determining separation between fast and slow runoff |
| Cmax              | Mm          | 0          | 1000       | max soil moisture storage                                     |
| Beta              | -           | 0.01       | 3.0        | the non linear parameter for runoff production                |
| Kq                | Days        | 1.0        | 3.0        | storage coefficient for fast response                         |
| Ks                | Days        | 1.0        | 20         | storage coefficient for slow response                         |

### S3. Objective function values

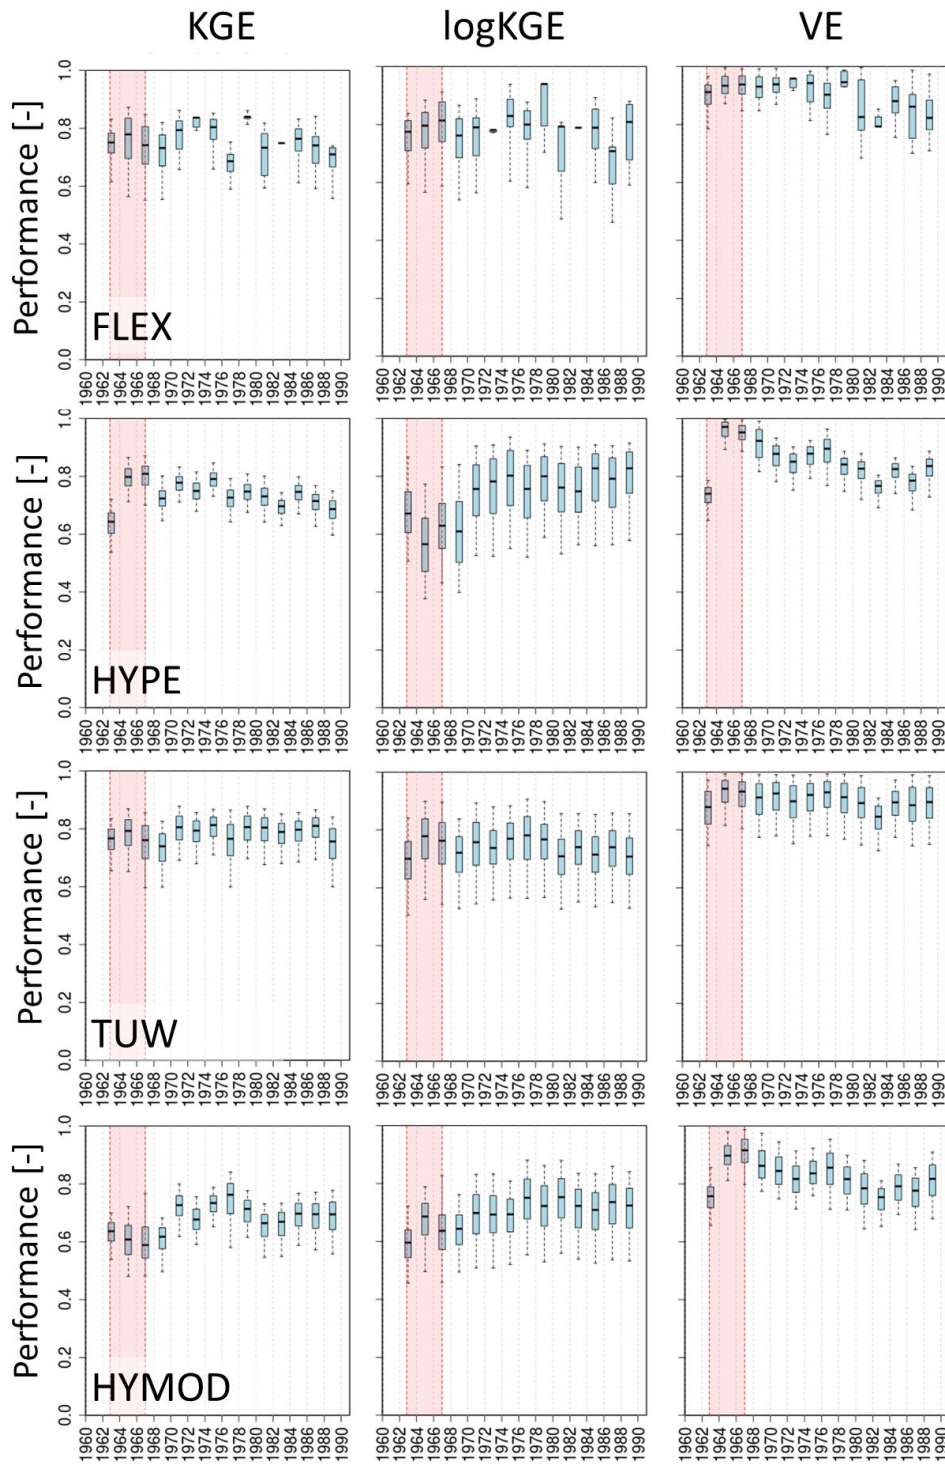

Figure S5. Objective function values of Kling-Gupta Efficiency (KGE), log Kling-Gupta Efficiency (logKGE) and volume error (VE) for HJ Andrews WS1 resulting from the calibration for each time window.

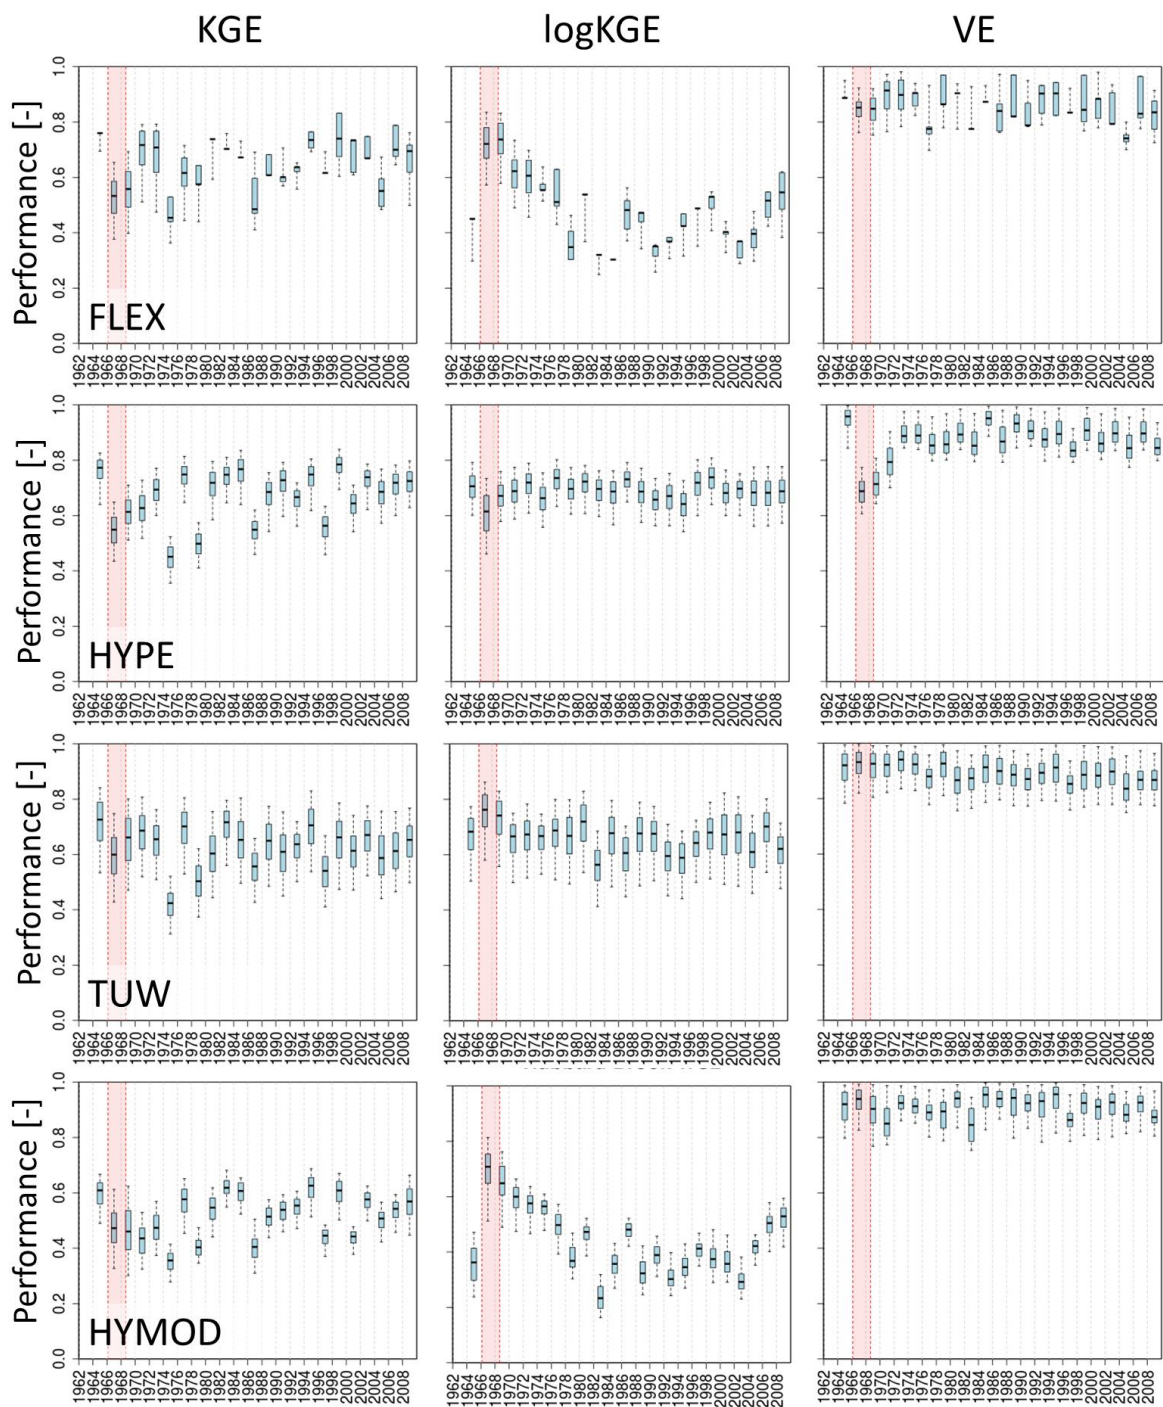

Figure S6. Objective function values of Kling-Gupta Efficiency (KGE), log Kling-Gupta Efficiency (logKGE) and volume error (VE) for Hubbard Brook WS2 resulting from the calibration for each time window.

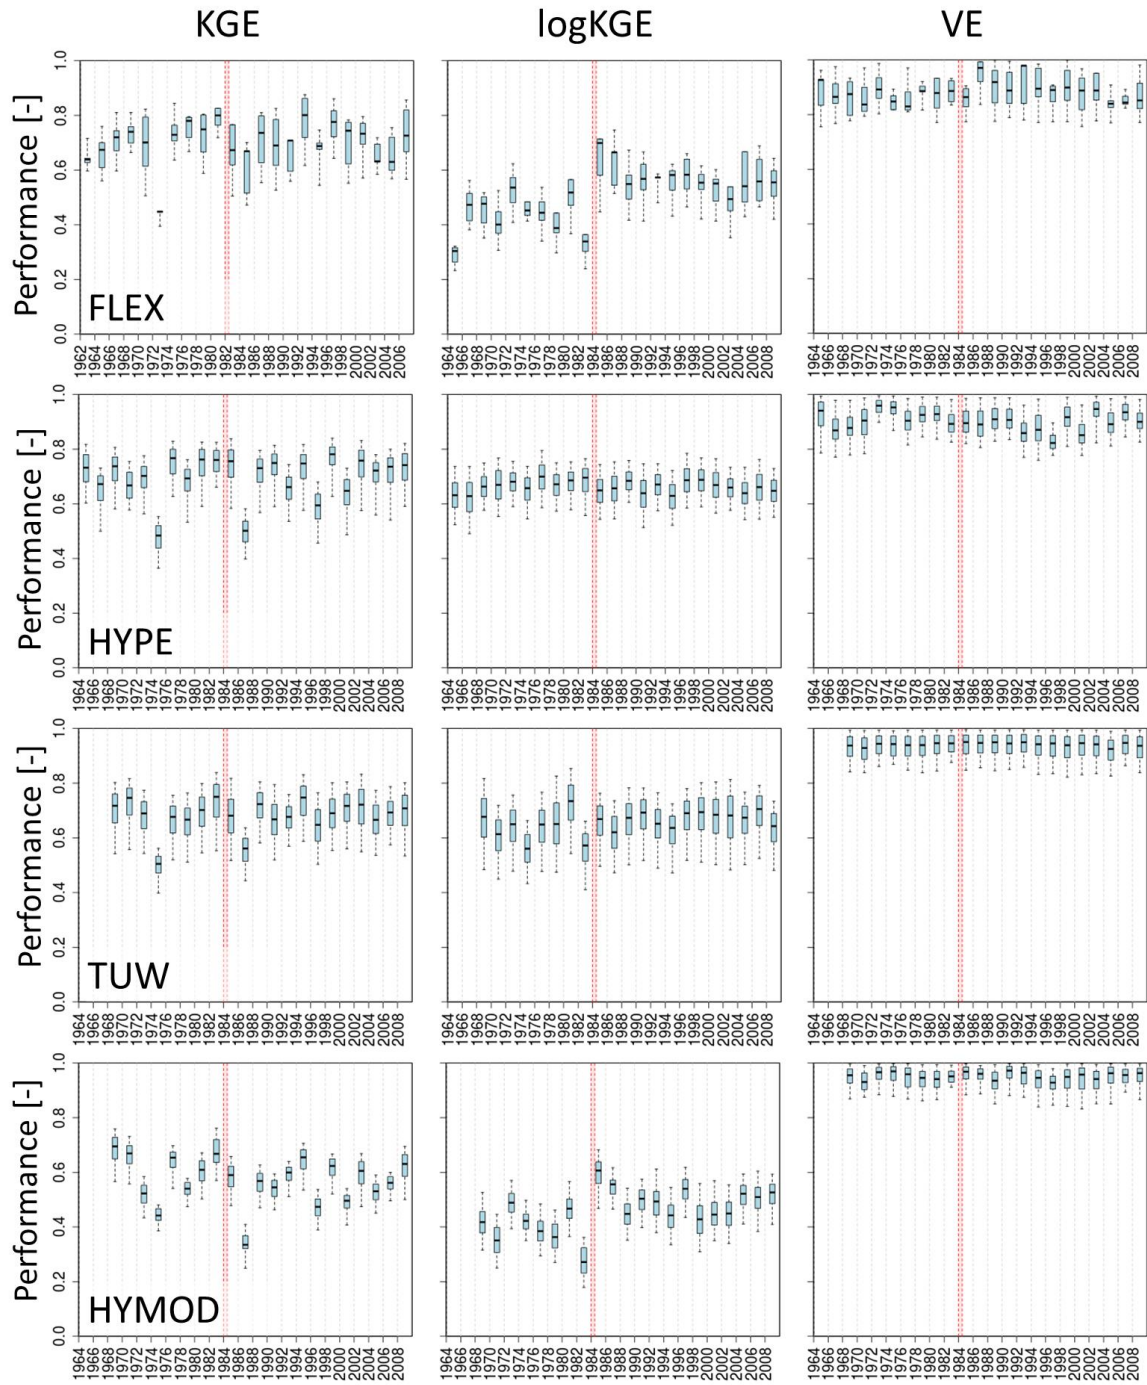

Figure S7. Objective function values of Kling-Gupta Efficiency (KGE), log Kling-Gupta Efficiency (logKGE) and volume error (VE) for Hubbard Brook WS5 resulting from the calibration for each time window.



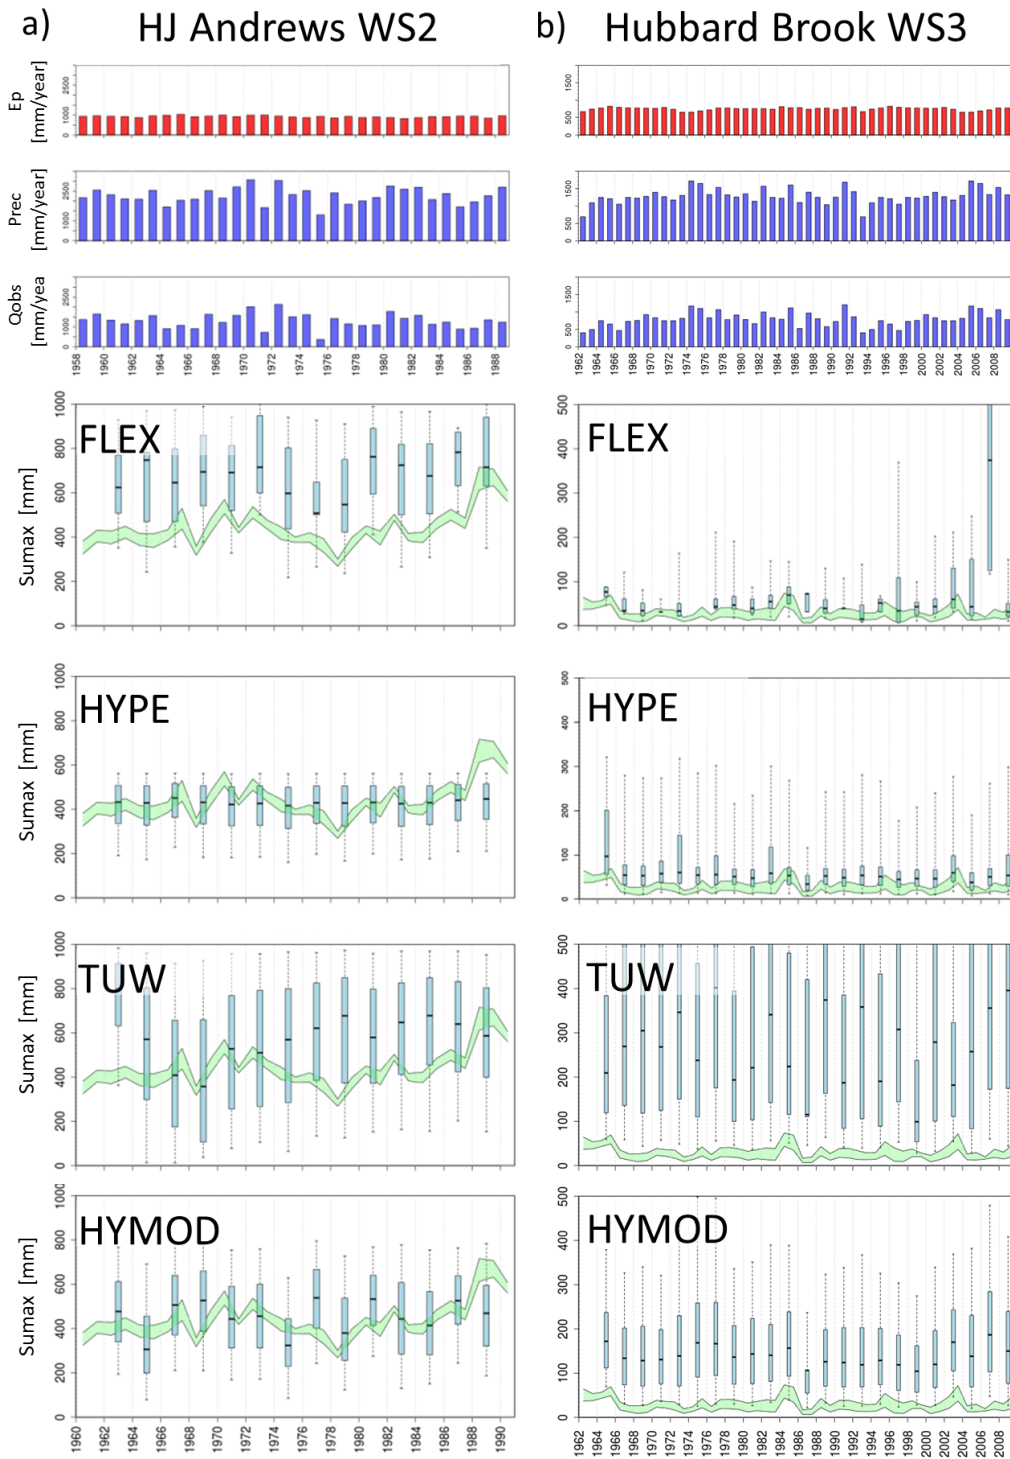

Figure S8. Evolution of root zone storage capacity  $S_{R,1yr}$  from water balance-based estimation (green shaded area, a range of solutions due to the sampling of the unknown interception capacity) compared with  $S_{u,max,2yr}$  estimates obtained from the calibration of four models (FLEX, HYPE, TUW, HYMOD; blue boxplots) for a) HJ Andrews WS2, b) Hubbard Brook WS3.

## S4. Posterior parameter distributions

### 4.1 FLEX

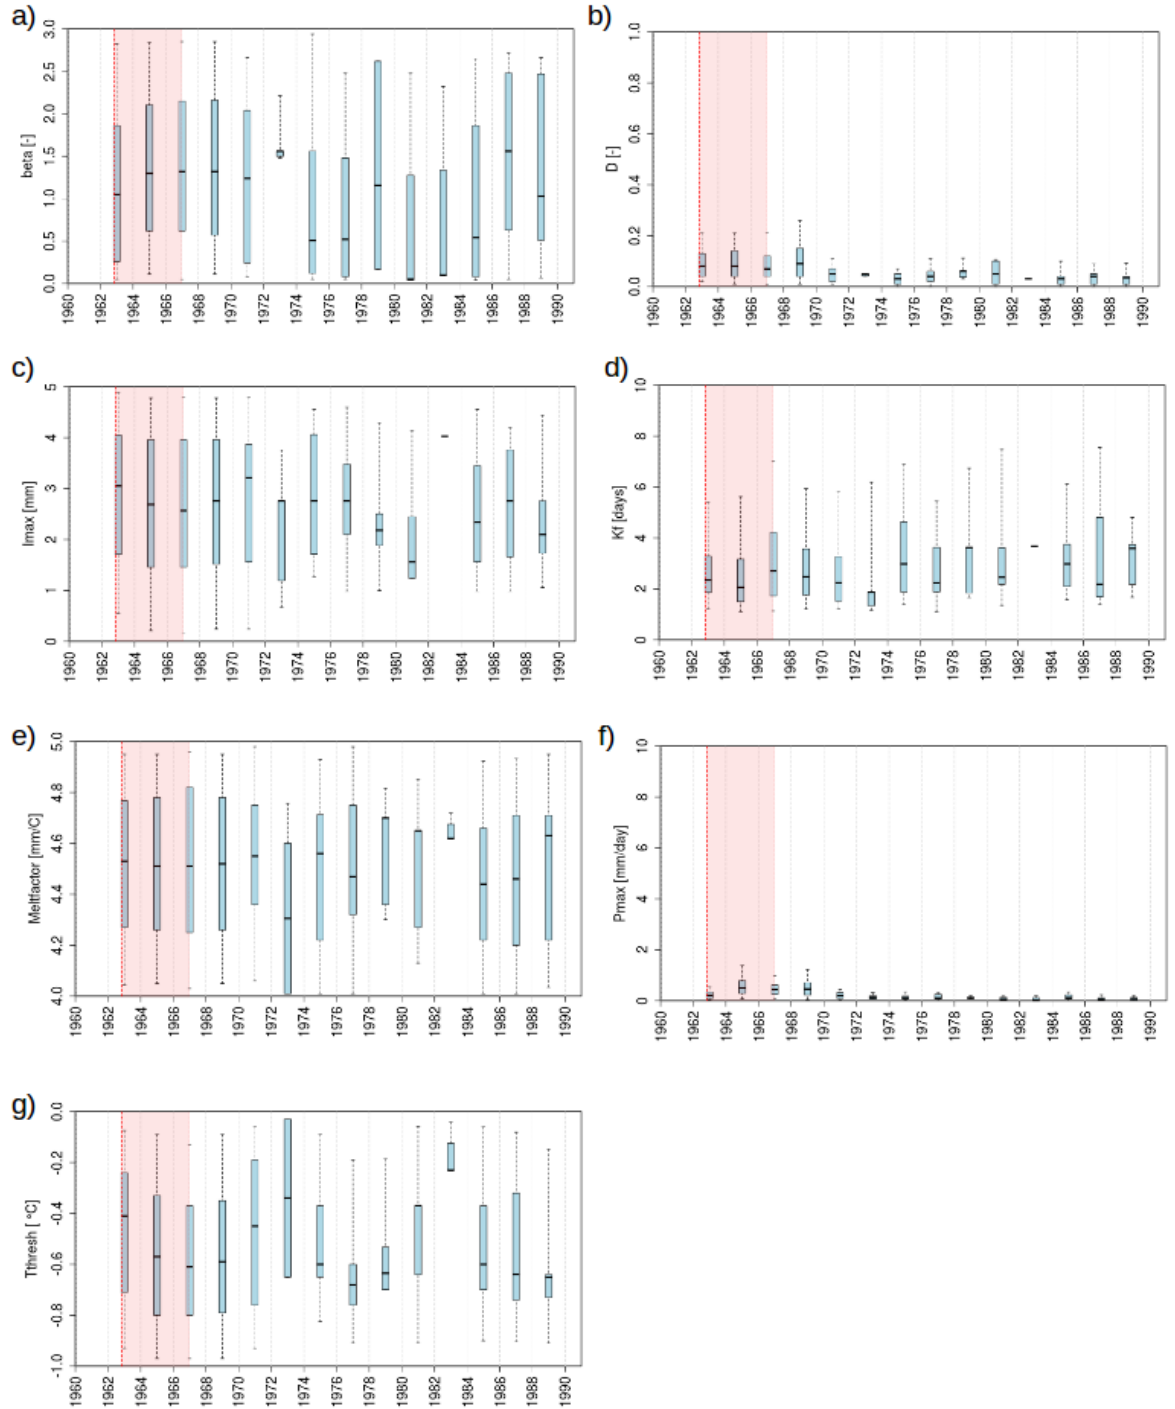

Figure S9. Posterior parameter distributions for the FLEX model in HJ Andrews WS1.

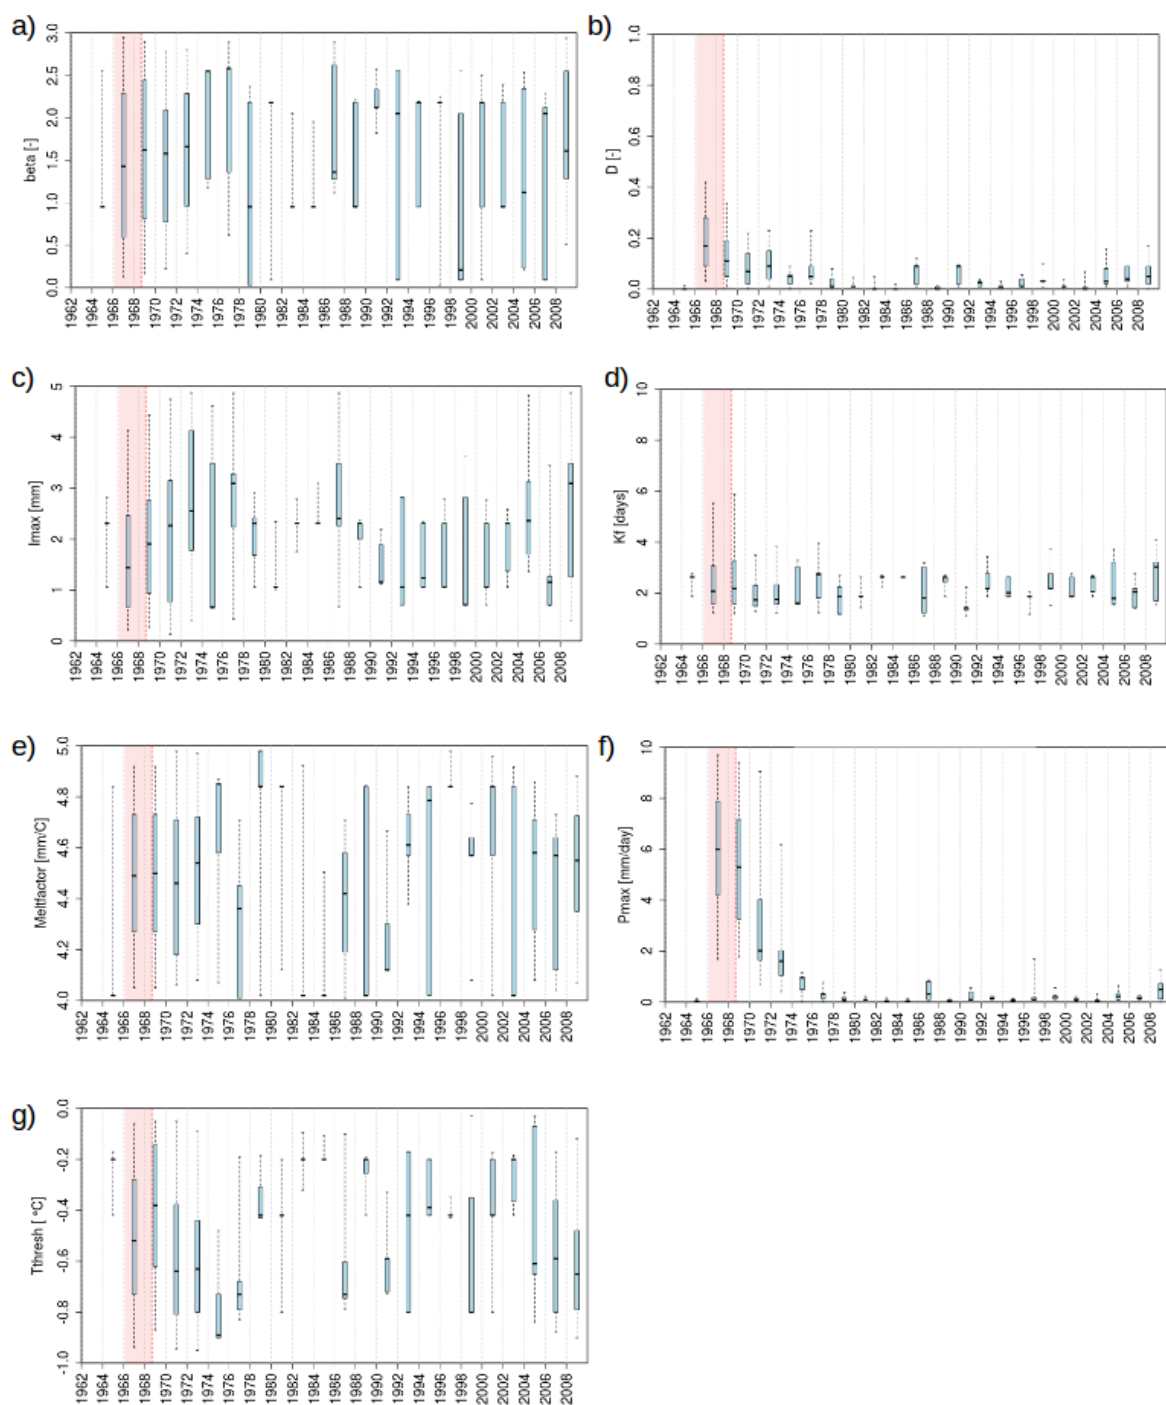

Figure S10. Posterior parameter distributions for the FLEX model in Hubbard Brook WS2.

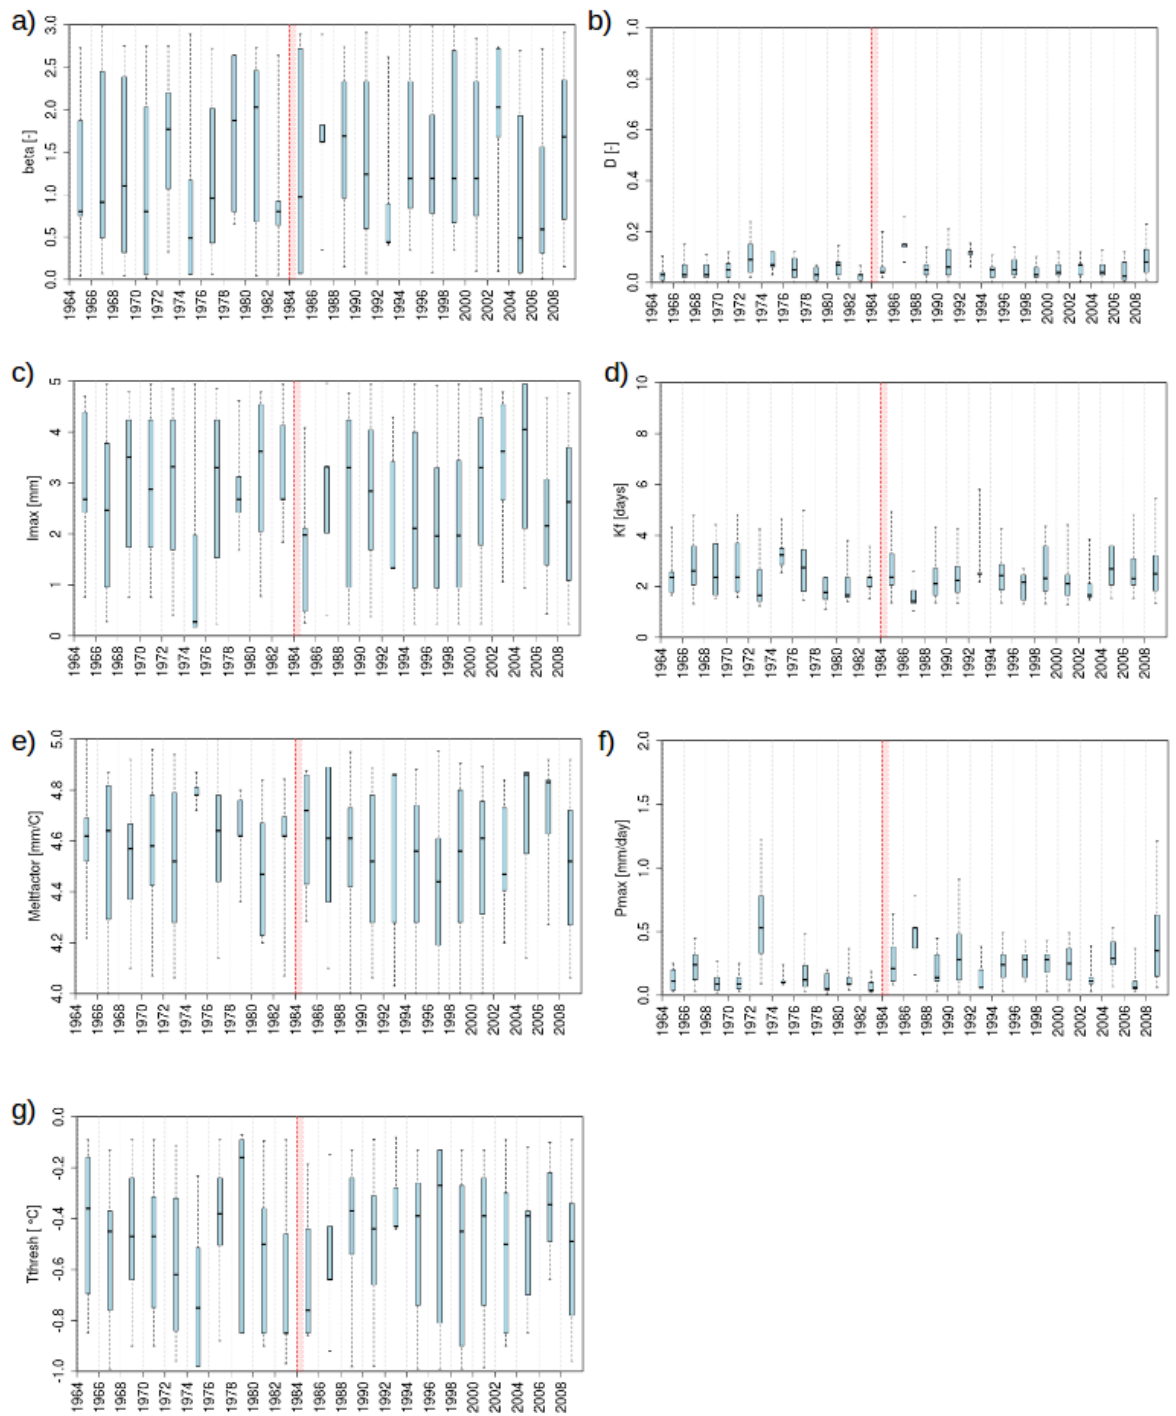

Figure S11. Posterior parameter distributions for the FLEX model in Hubbard Brook WS2.

## 4.2 HYPE

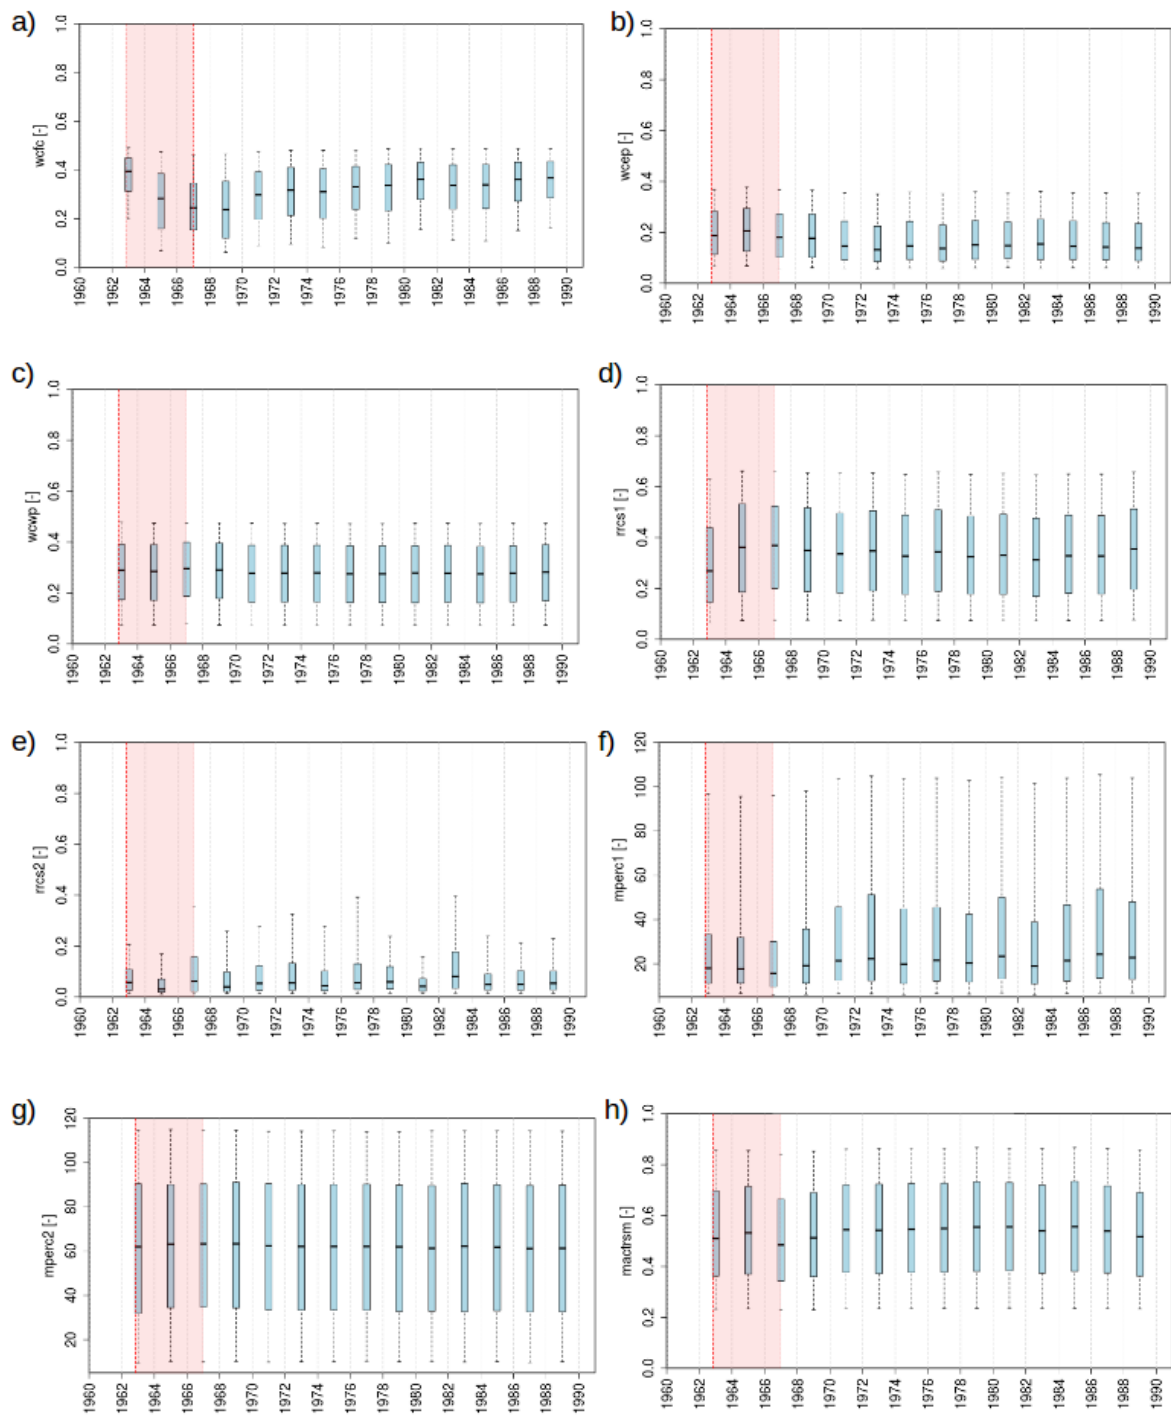

Figure S12. Posterior parameter distributions for the HYPE model in HJ Andrews WS1.

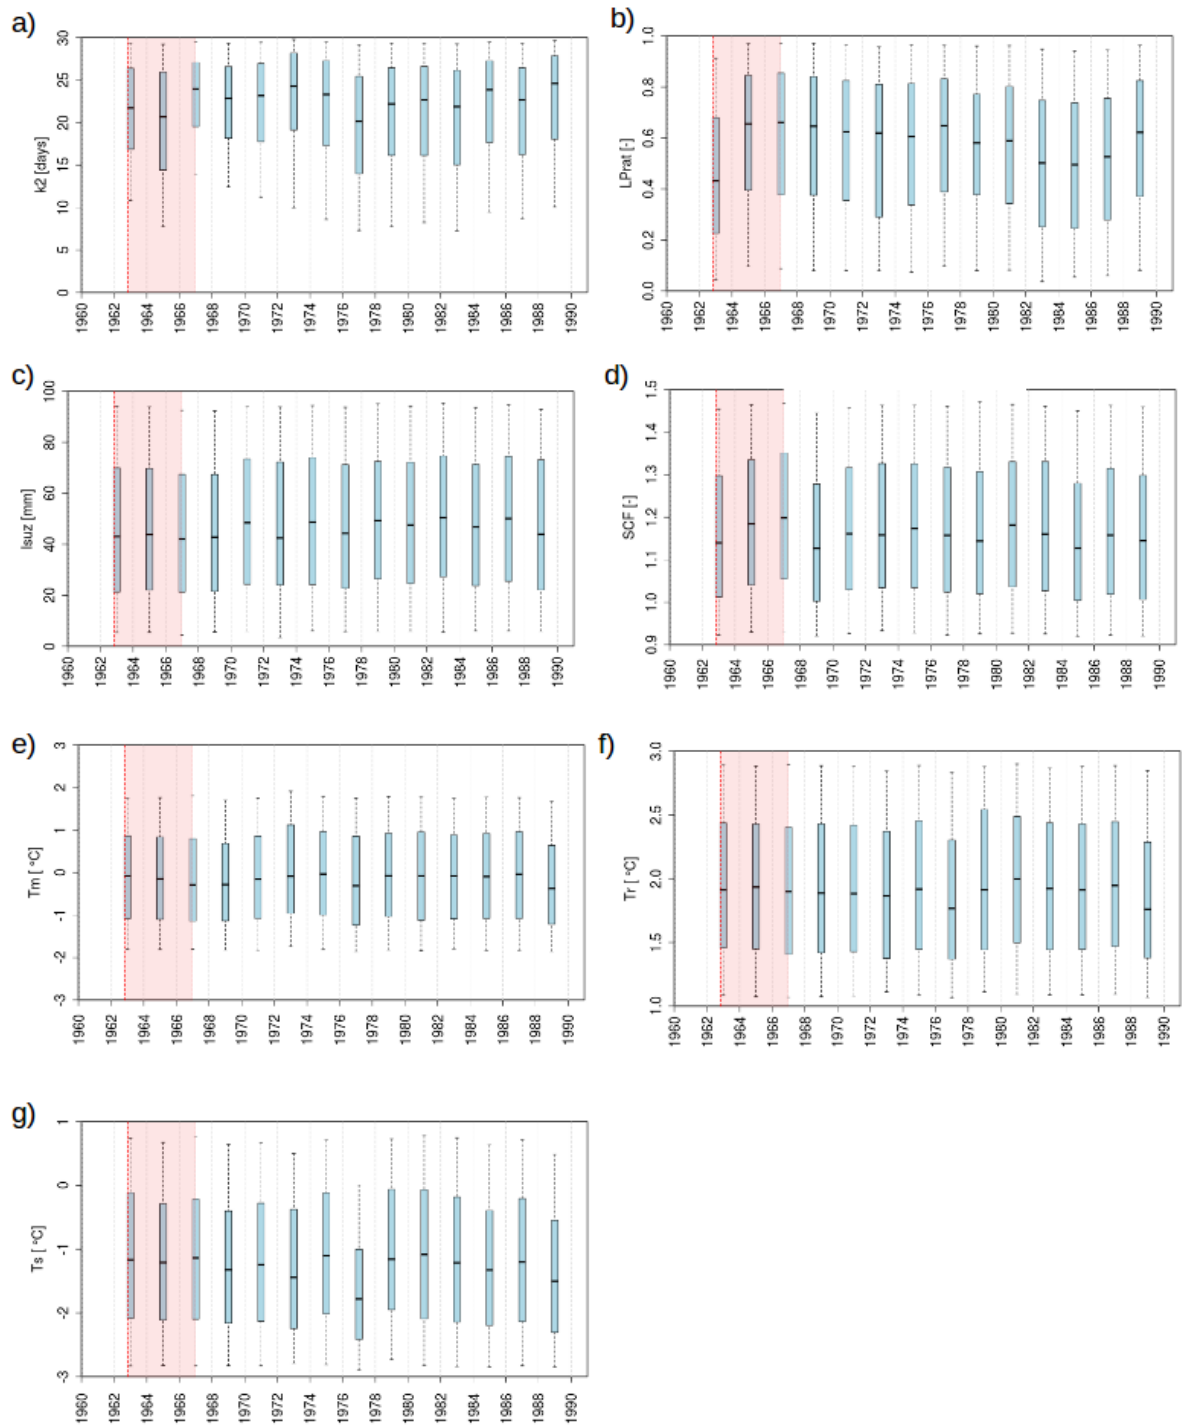

Figure S13. Continued posterior parameter distributions for the HYPE model in HJ Andrews WS1.

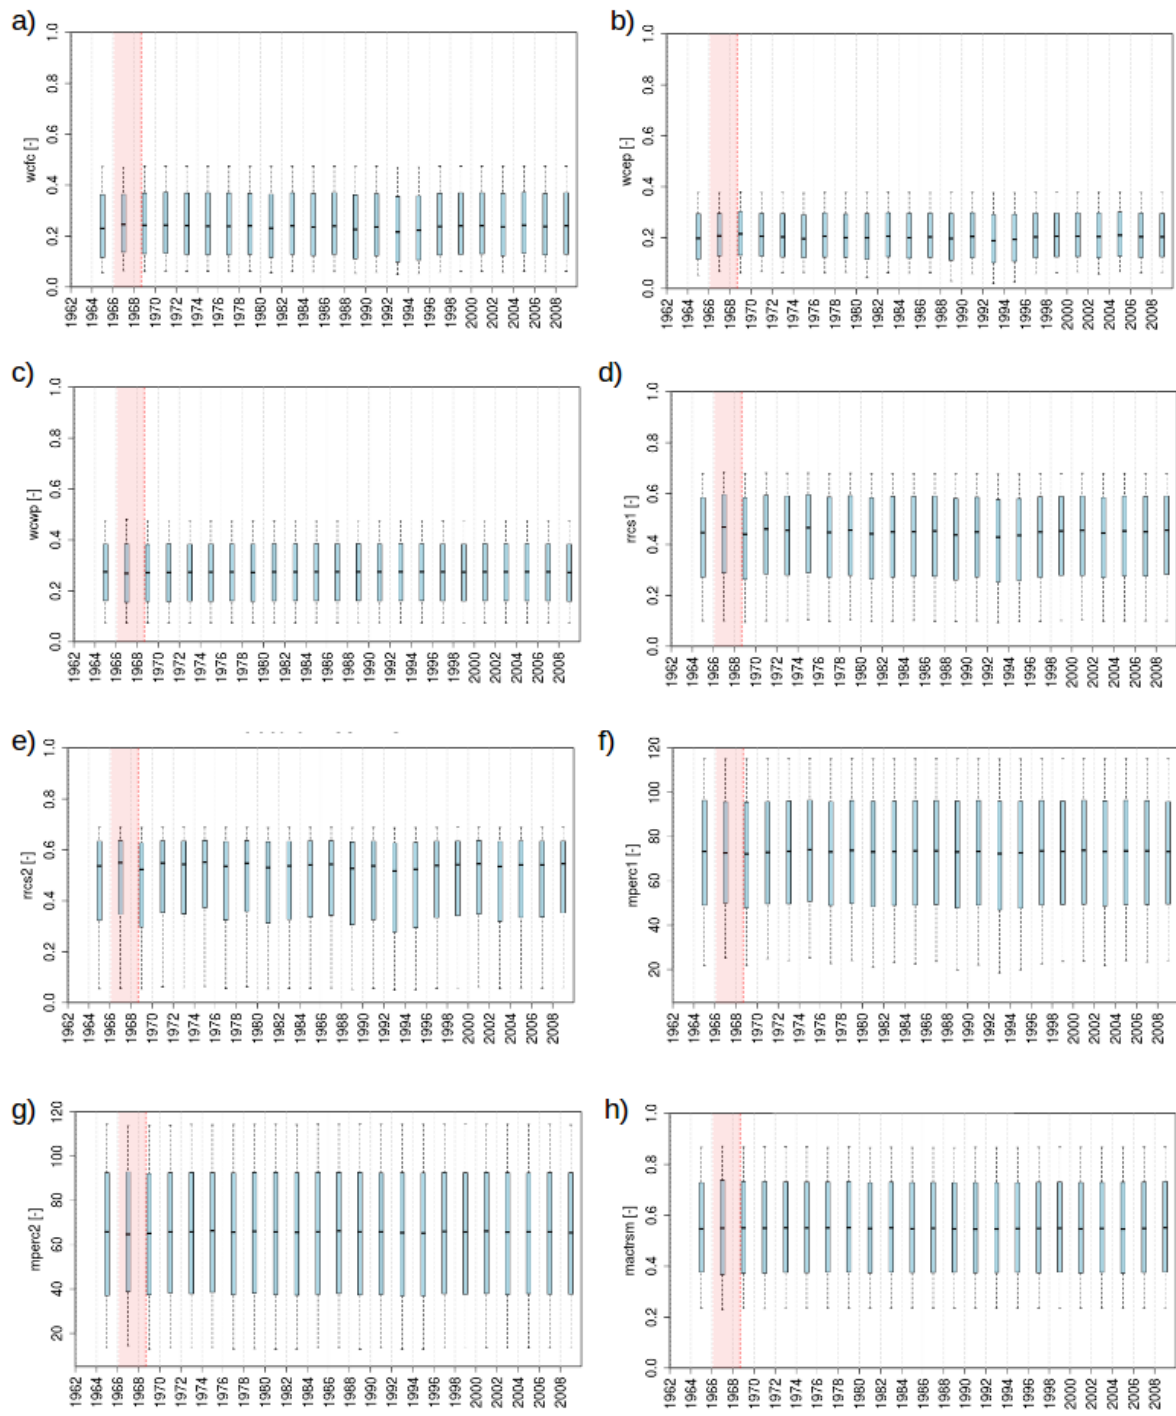

Figure S14. Posterior parameter distributions for the HYPE model in Hubbard Brook WS.

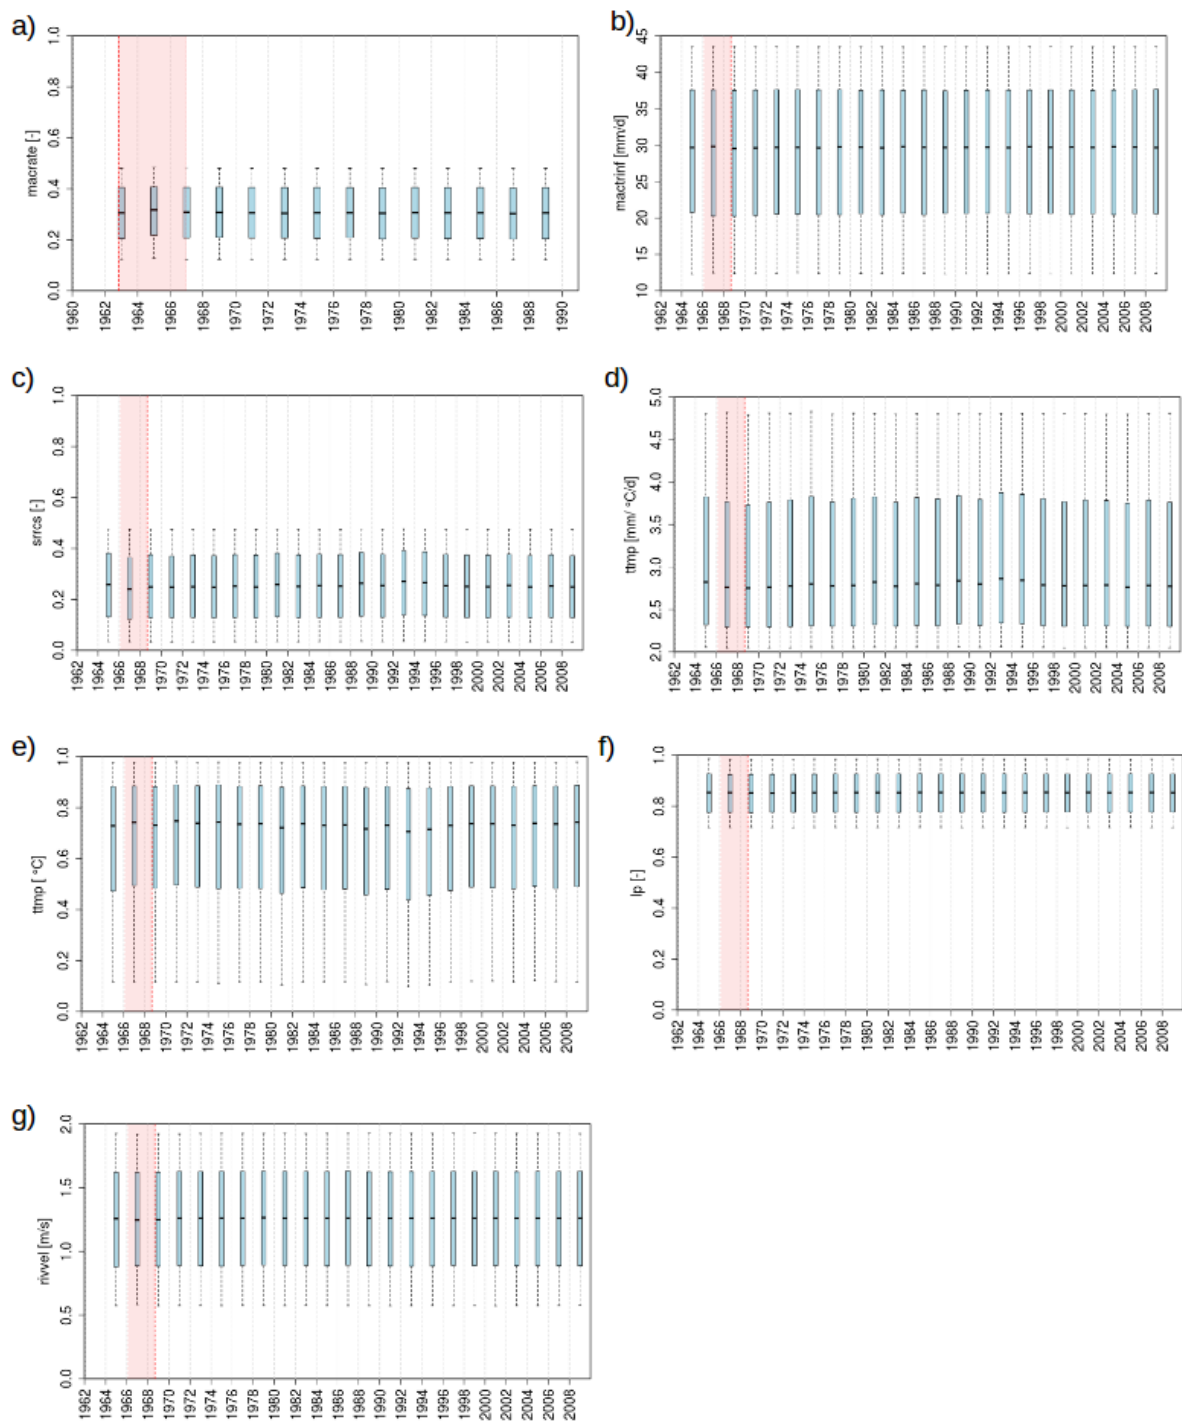

Figure S15. Continued posterior parameter distributions for the HYPE model in Hubbard Brook WS2.



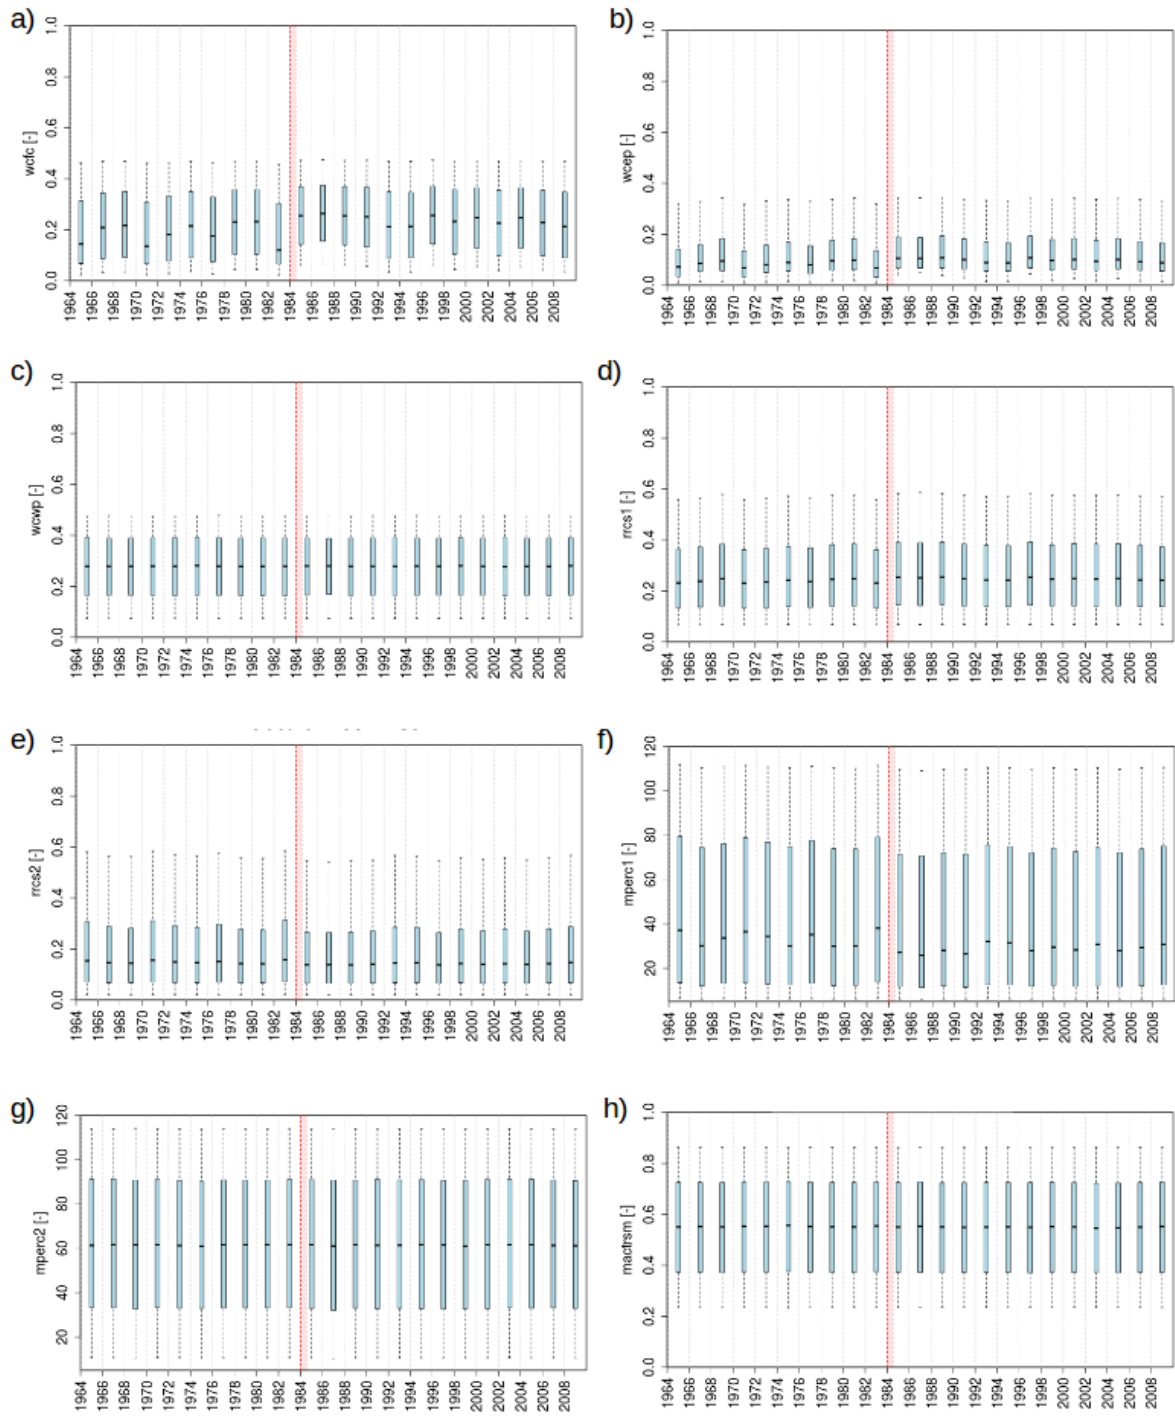

Figure S16. Posterior parameter distributions for the HYPE model in Hubbard Brook WS5.

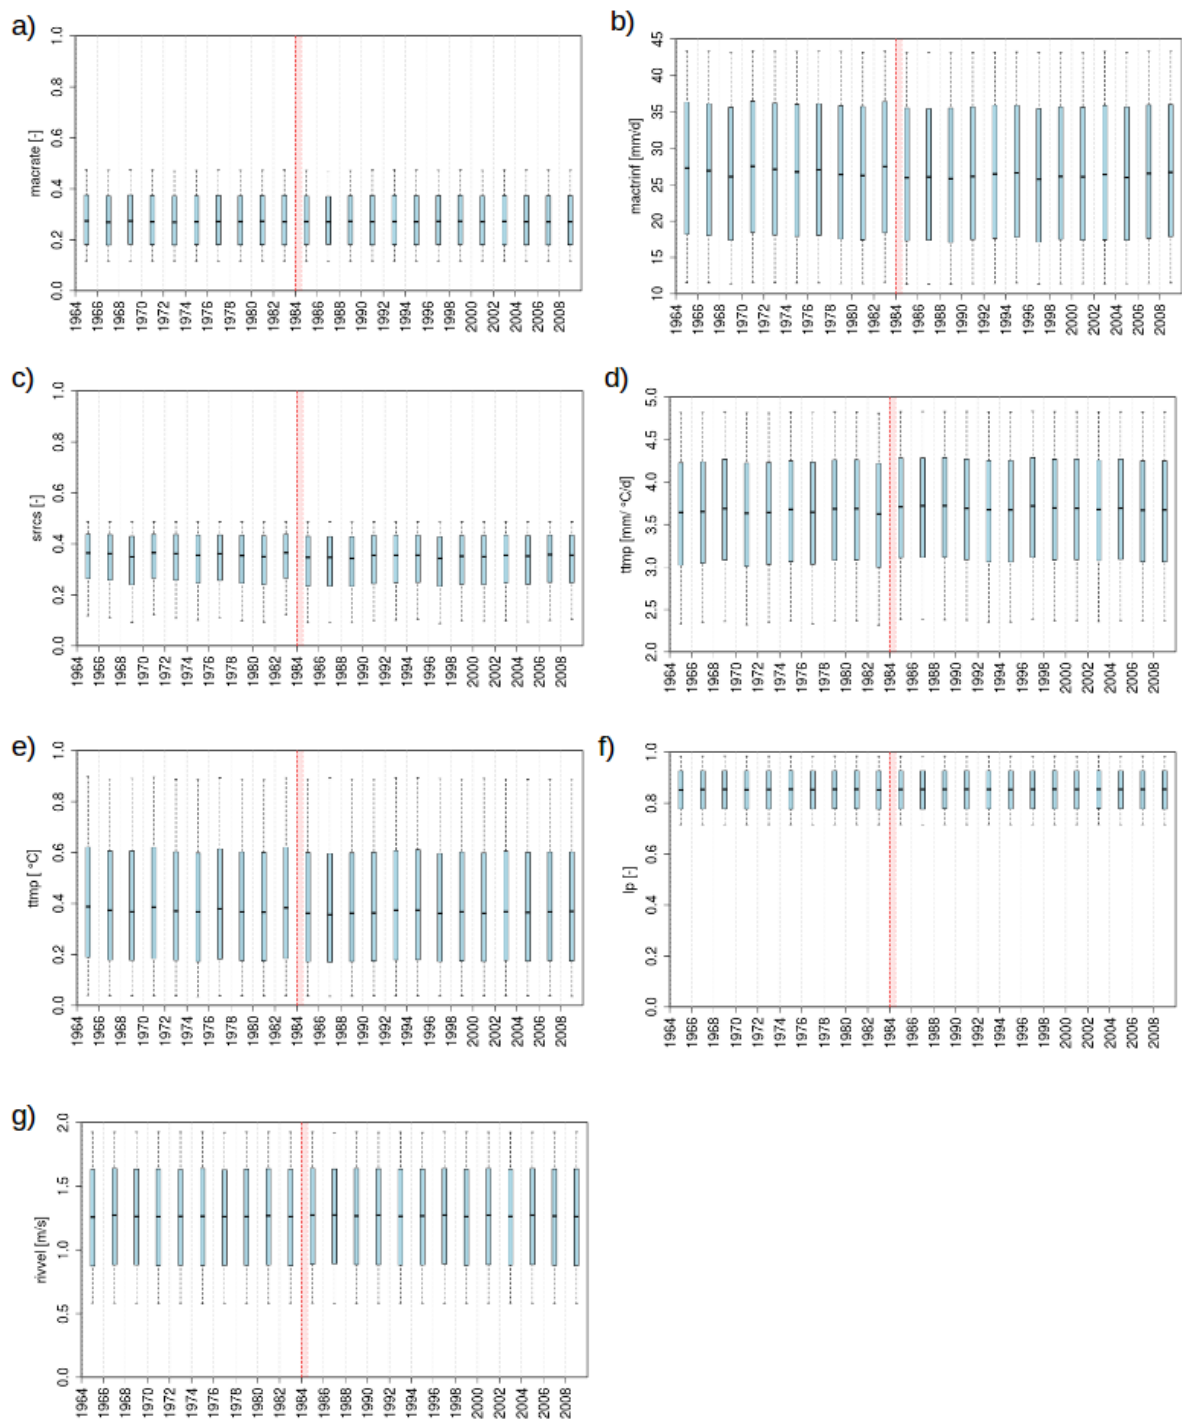

Figure S17. Continued posterior parameter distributions for the HYPE model in Hubbard Brook WS5.

### 4.3 HYMOD

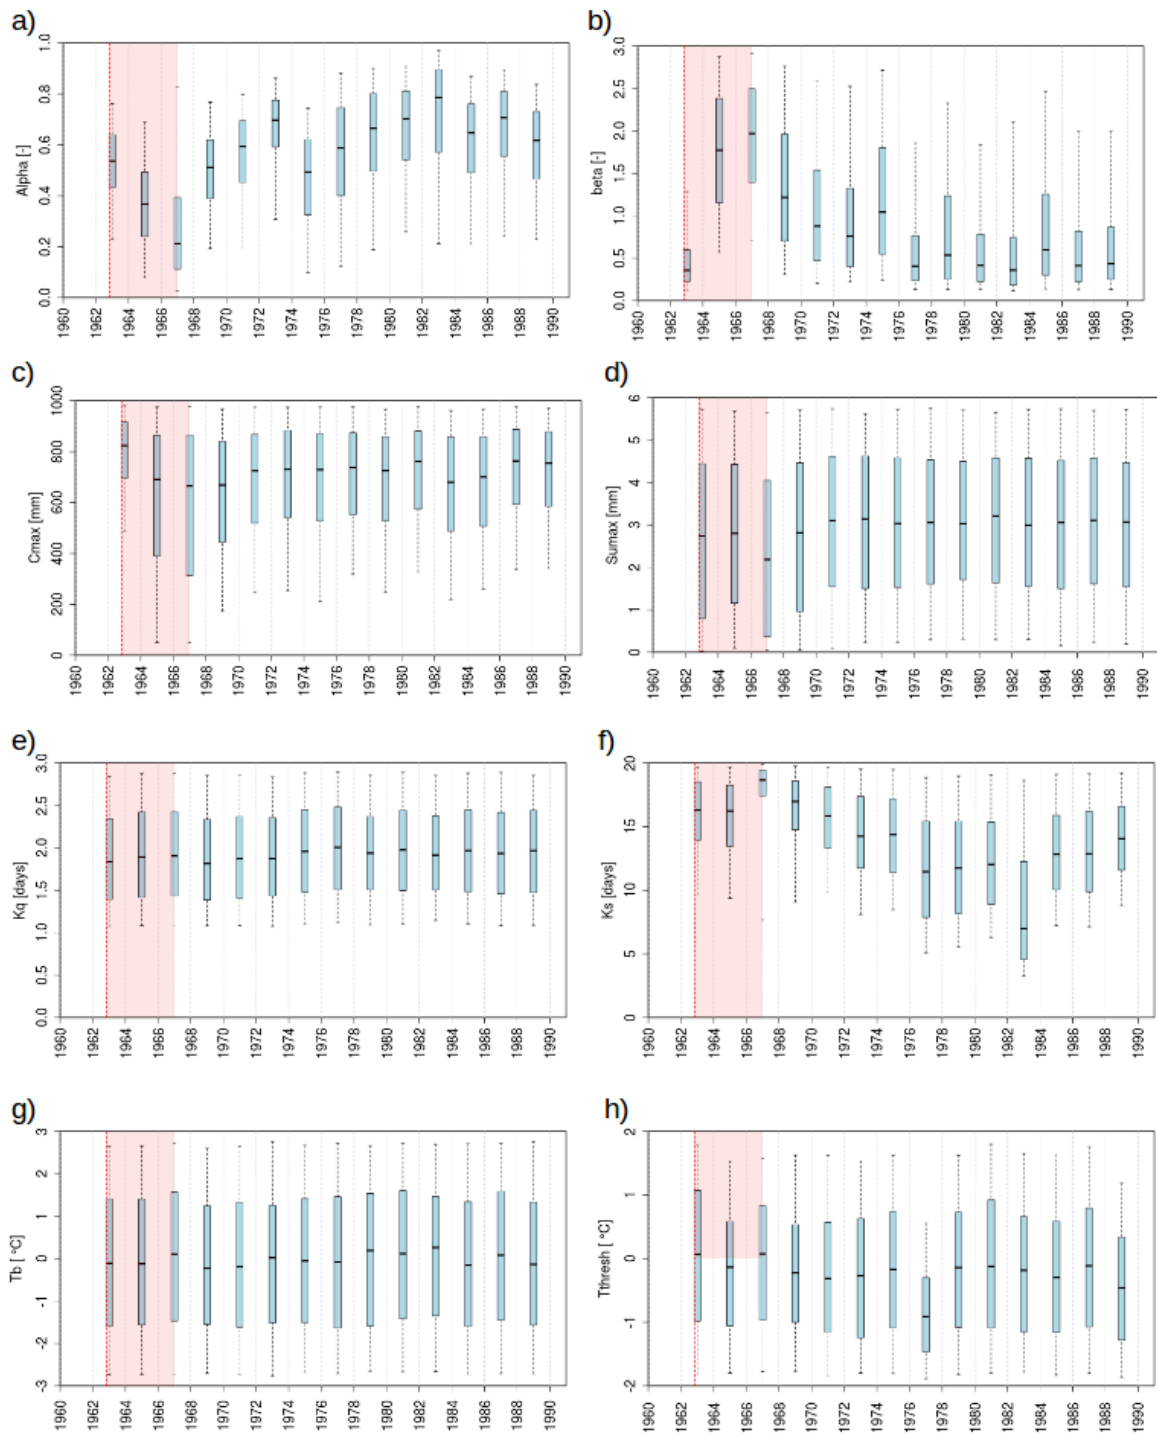

Figure S18. Posterior parameter distributions for the HYMOD model in HJ Andrews WS1.

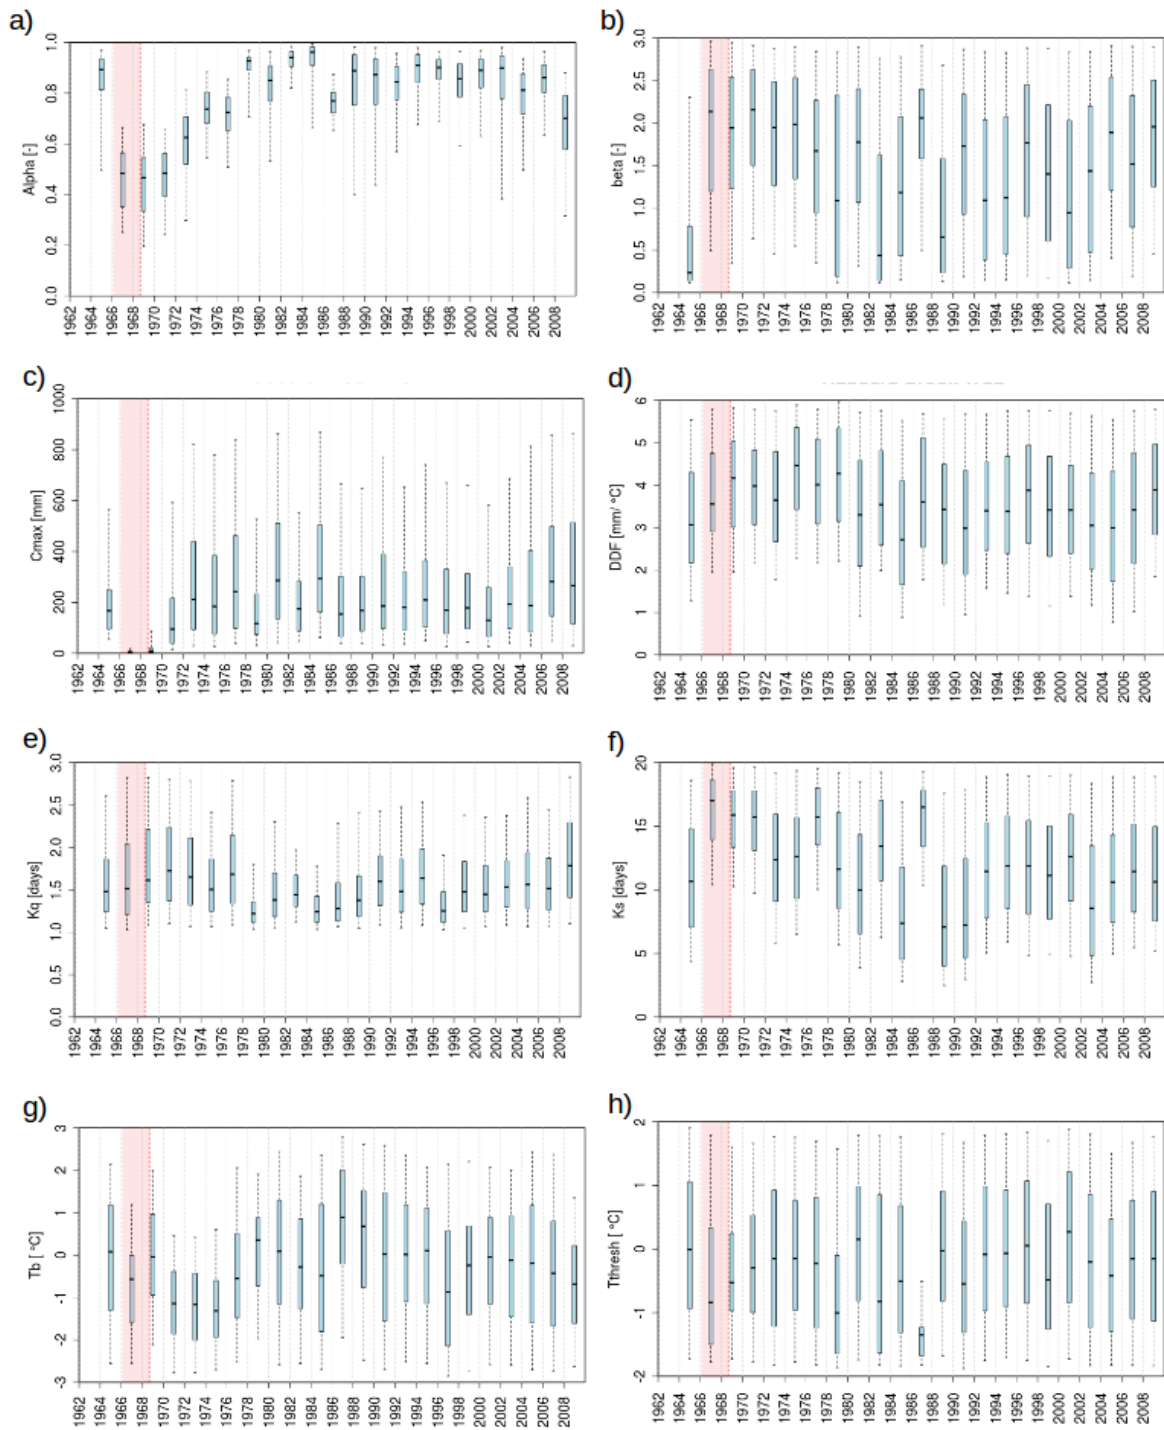

Figure S19. Posterior parameter distributions for the HYMOD model in Hubbard Brook WS2.

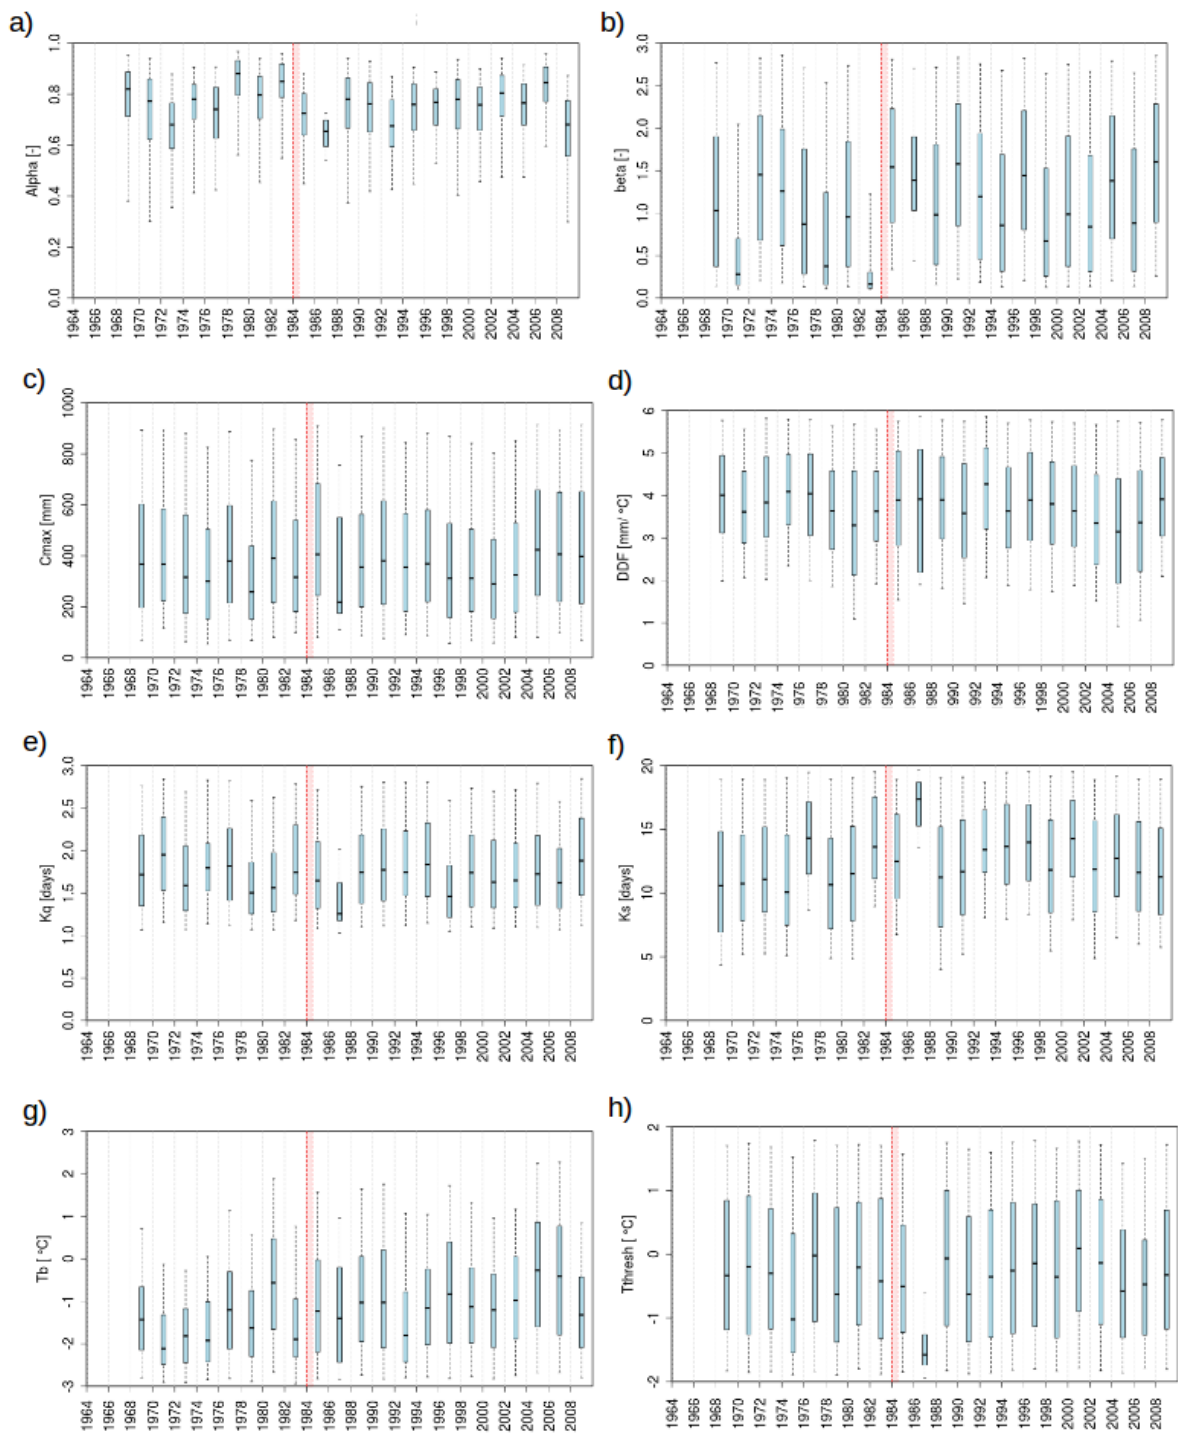

Figure S20. Posterior parameter distributions for the HYMOD model in Hubbard Brook WS5.

## 4.4 TUW

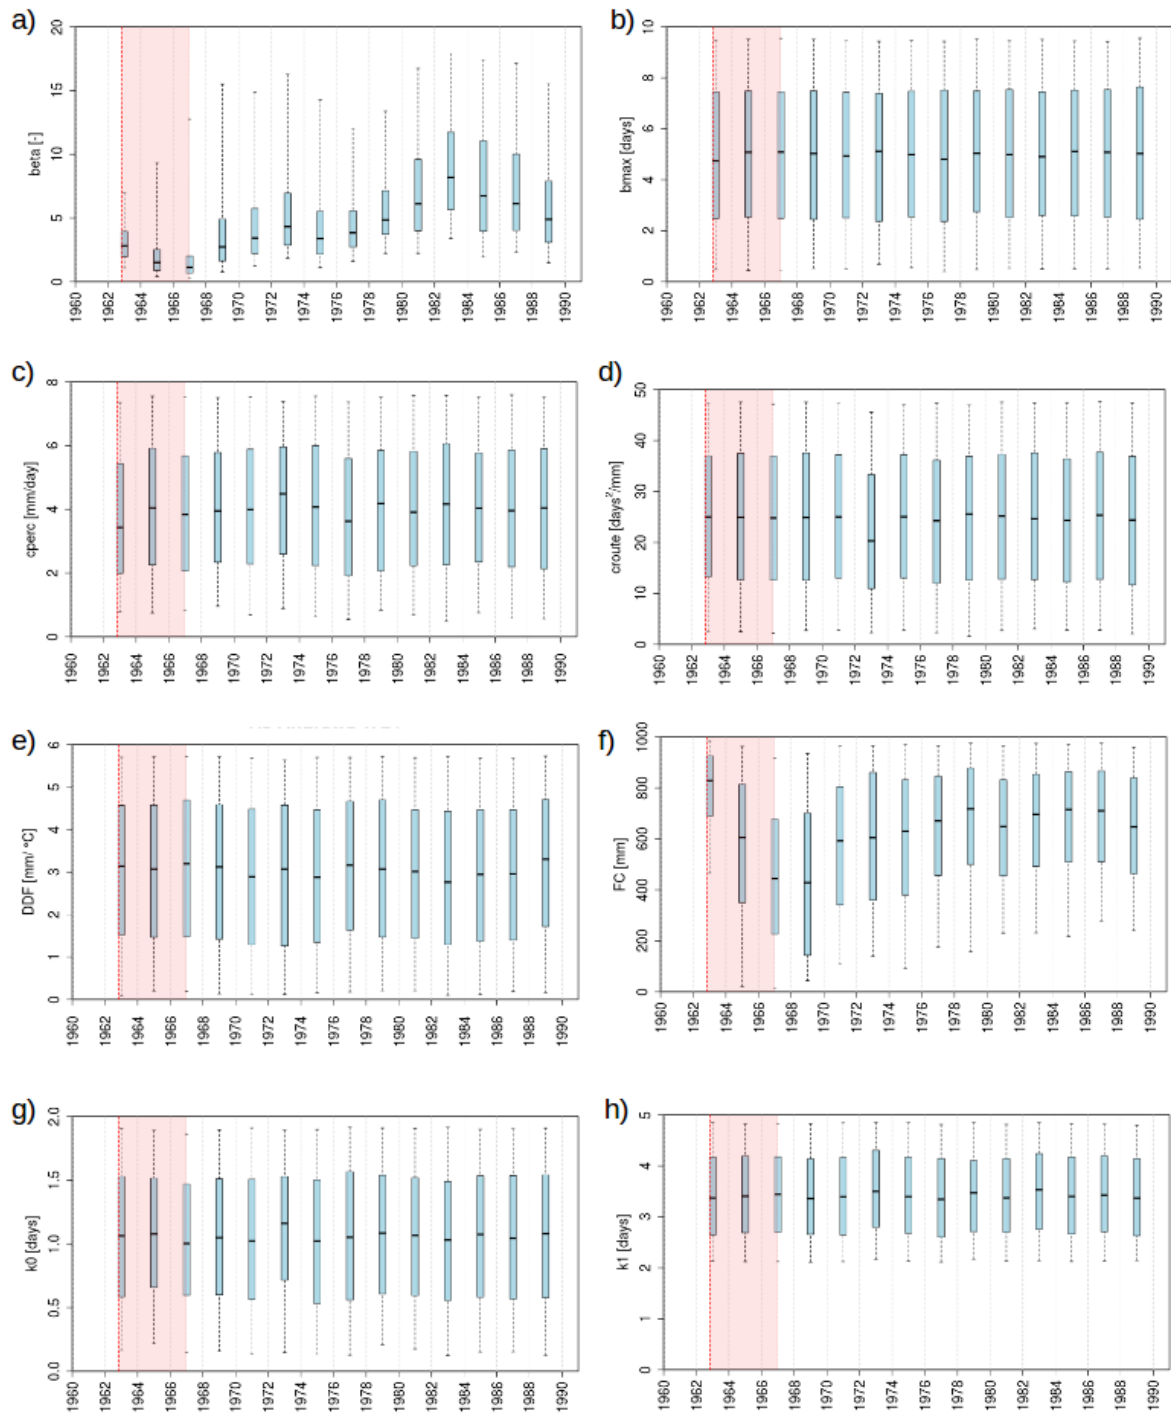

Figure S21. Posterior parameter distributions for the TUW model in HJ Andrews WS1.

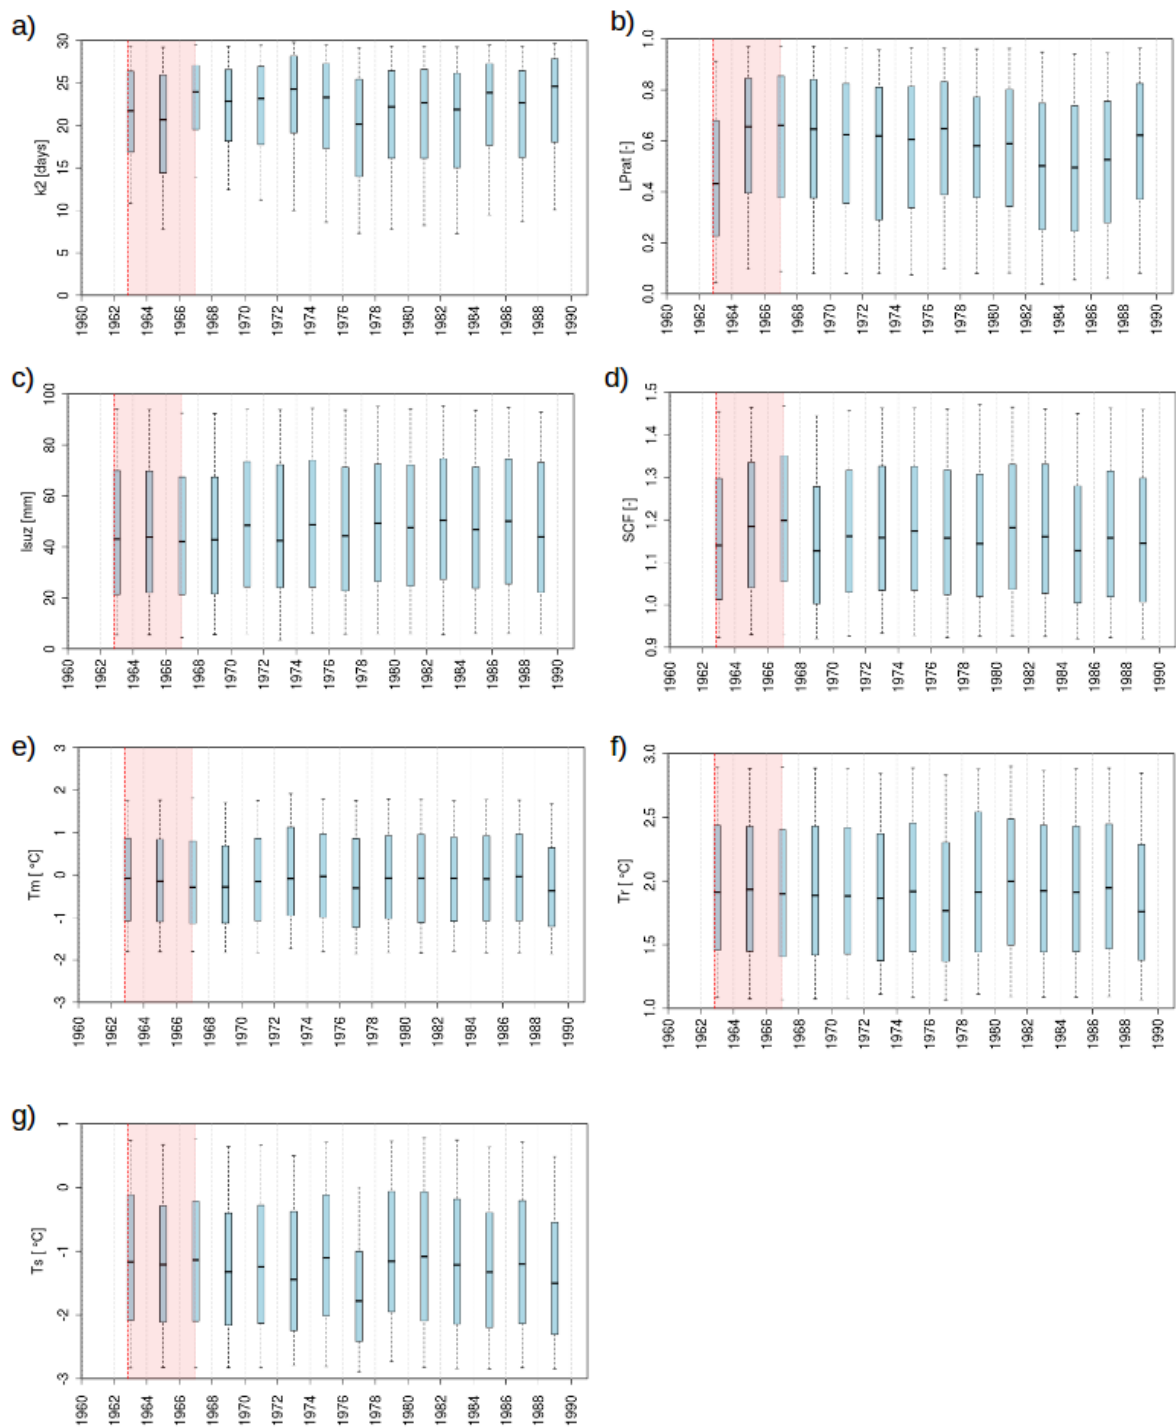

Figure S22. Continued posterior parameter distributions for the TUW model in HJ Andrews WS1.

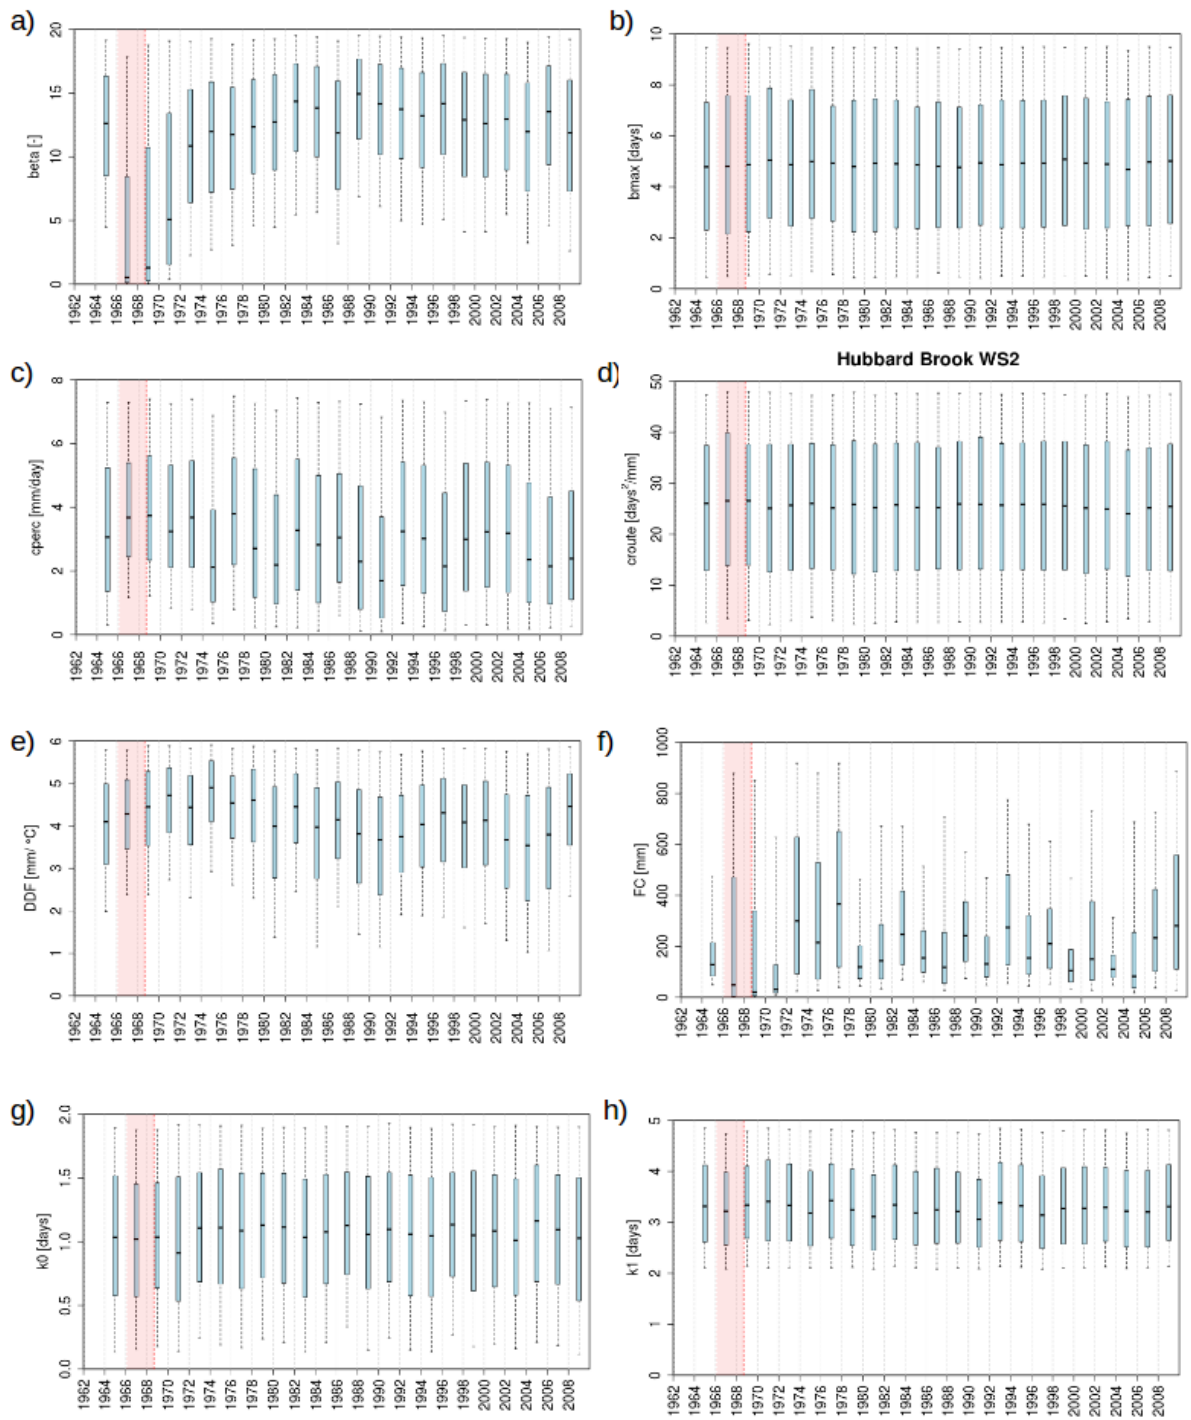

Figure S23. Posterior parameter distributions for the TUW model in Hubbard Brook WS2.



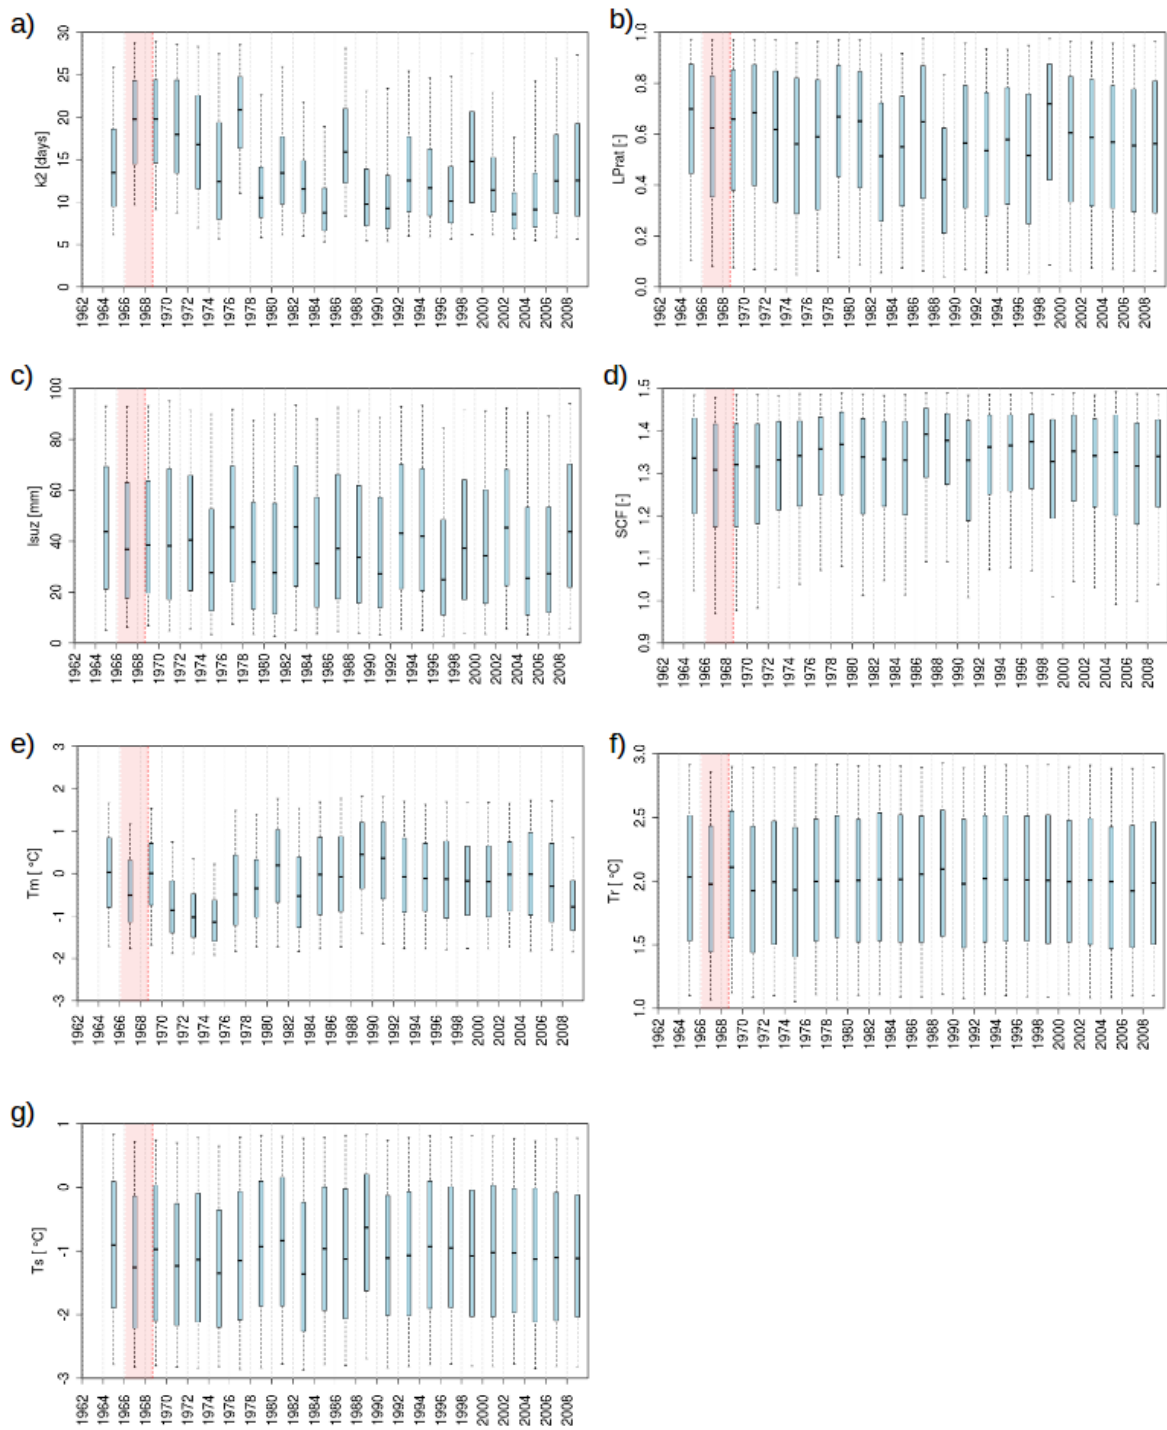

Figure S24. Continued posterior parameter distributions for the HYMOD model in Hubbard Brook WS2.

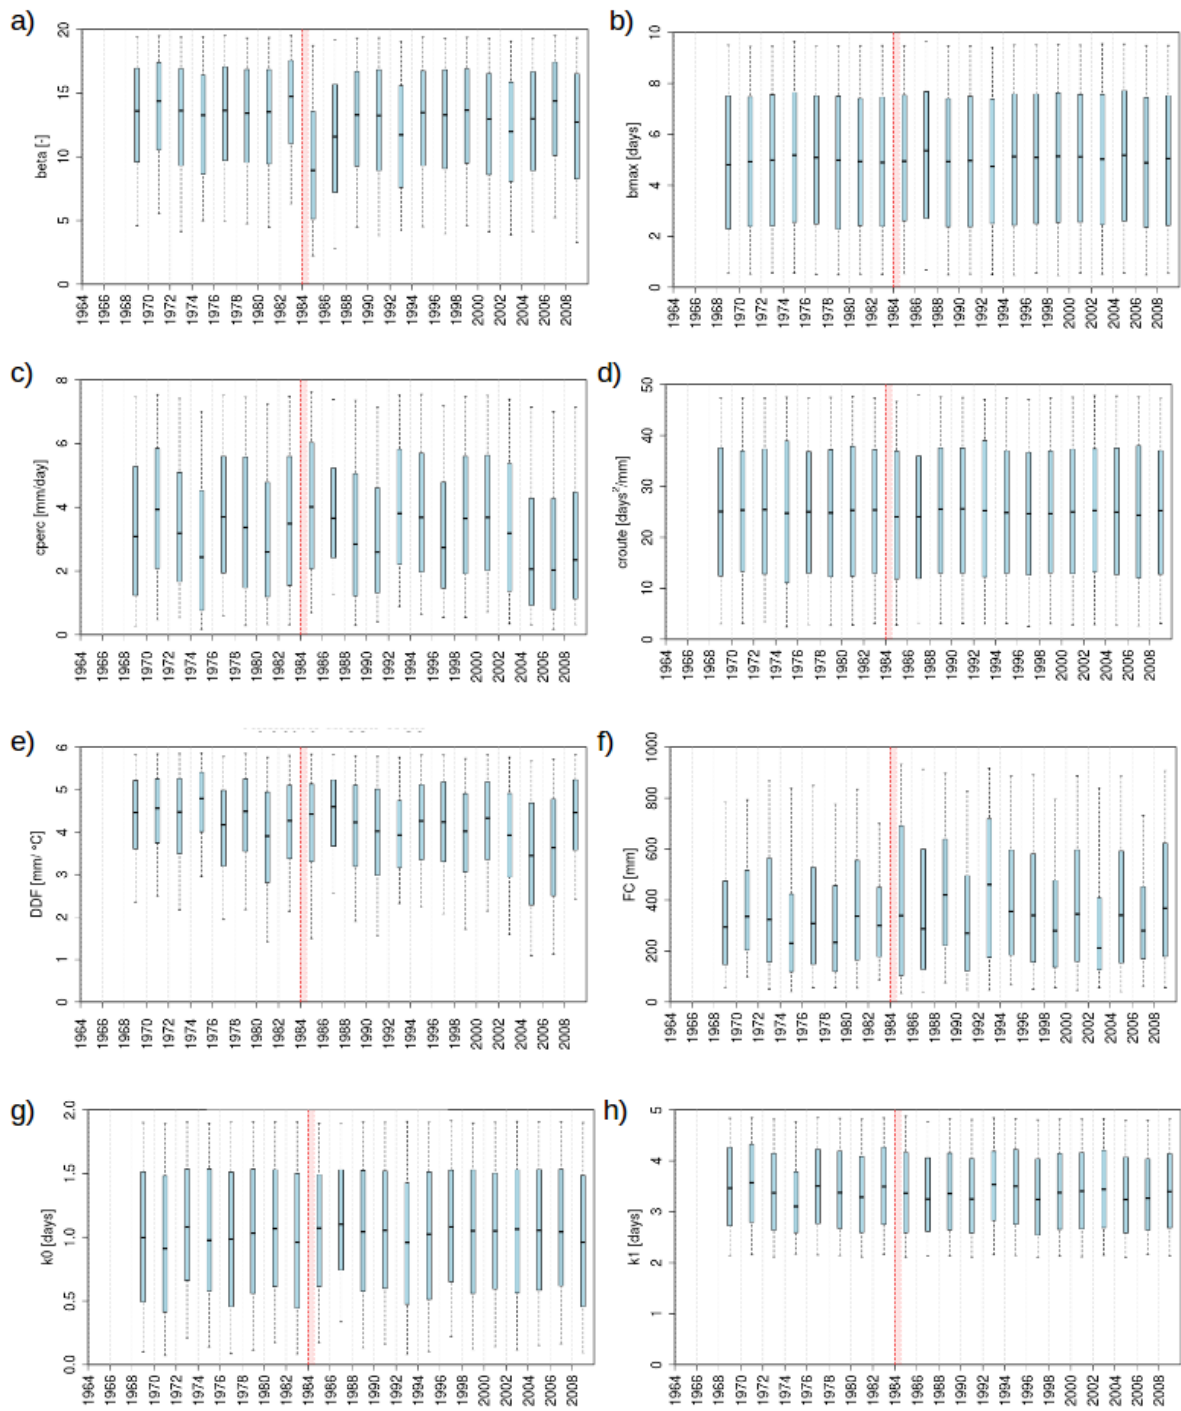

Figure S25. Posterior parameter distributions for the HYMOD model in Hubbard Brook WS5.

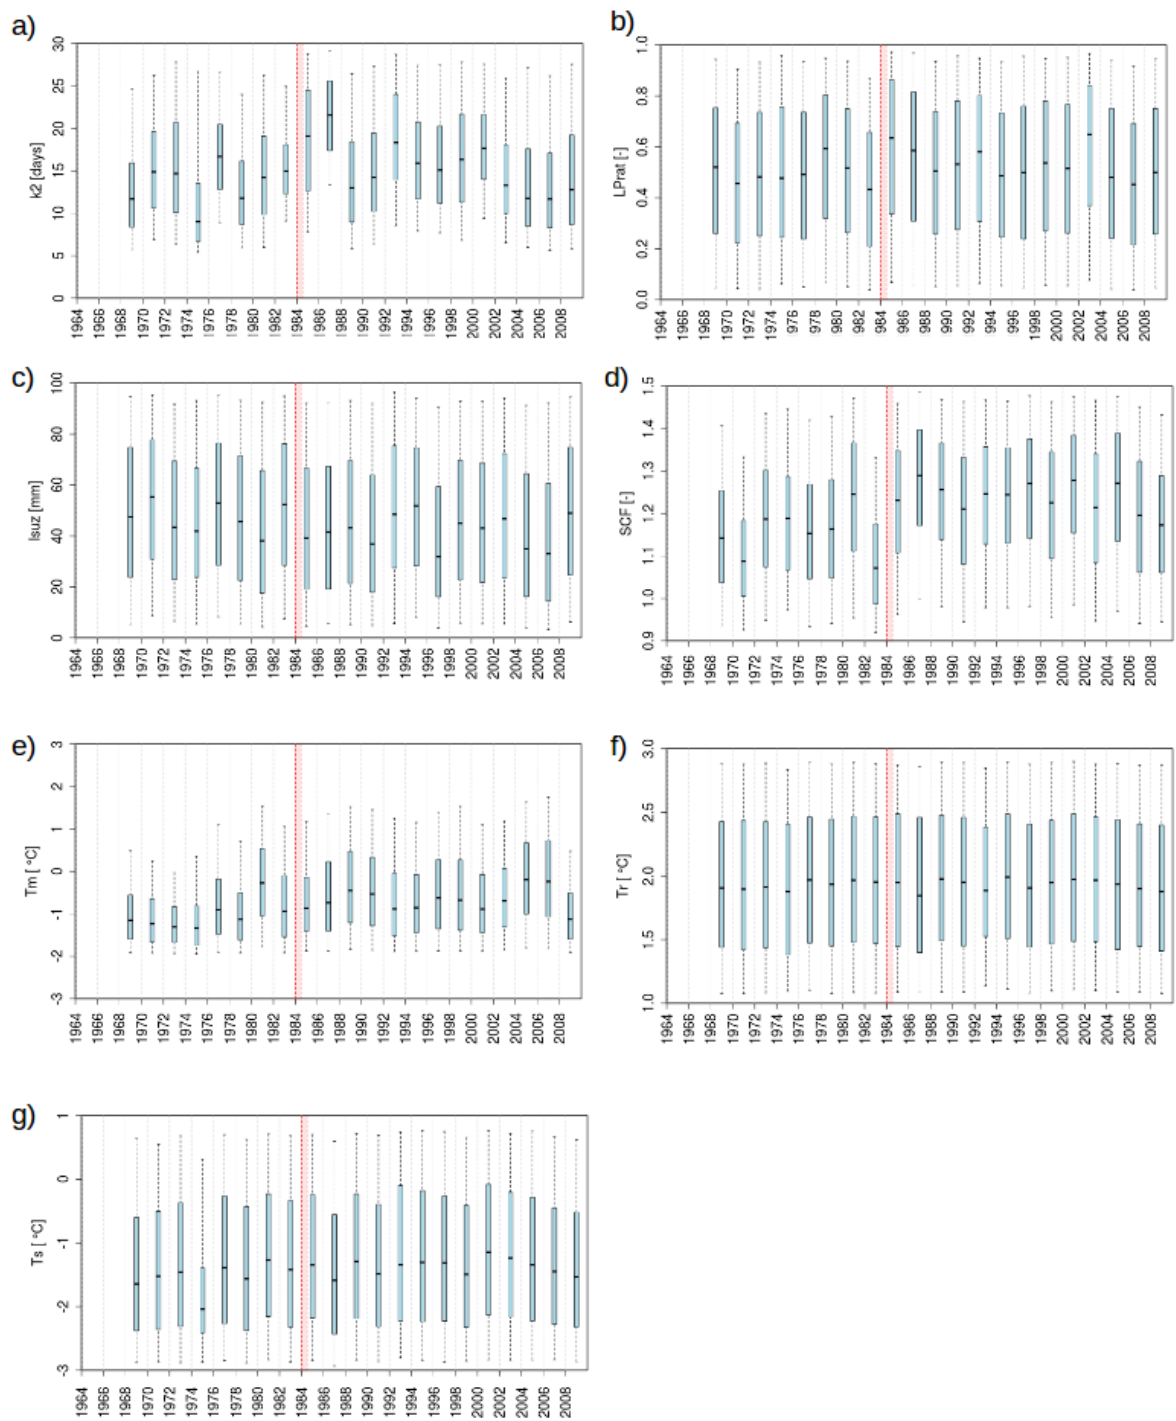

Figure S26. Continued posterior parameter distributions for the HYMOD model in Hubbard Brook WS5.
